# Supplementary material for: Exposure to early-life adversity and long-term trajectories of multimorbidity among older adults in China: analysis of longitudinal data from the China Health and Retirement Longitudinal Study
Source: PubMed Central journal article supplement — BMJ Open. 2024 Mar 13;14(3):e075834. doi: 10.1136/bmjopen-2023-075834 (PMC10941172; doi:10.1136/bmjopen-2023-075834), 2024-03-13
Supplement: bmjopen-2023-075834.draft_revisions.pdf [file bmjopen-2023-075834.draft_revisions.pdf]

# BMJ Open

BMJ Open is committed to open peer review. As part of this commitment we make the peer review history of every article we publish publicly available.

When an article is published we post the peer reviewers' comments and the authors' responses online. We also post the versions of the paper that were used during peer review. These are the versions that the peer review comments apply to.

The versions of the paper that follow are the versions that were submitted during the peer review process. They are not the versions of record or the final published versions. They should not be cited or distributed as the published version of this manuscript.

BMJ Open is an open access journal and the full, final, typeset and author-corrected version of record of the manuscript is available on our site with no access controls, subscription charges or pay-per-view fees (<http://bmjopen.bmj.com>).

If you have any questions on BMJ Open's open peer review process please email [info.bmjopen@bmj.com](mailto:info.bmjopen@bmj.com)

# BMJ Open

## Early-Life Adversity Predicts Distinct Trajectories of Multimorbidity with Ageing from 50 to 85 years: A Nationwide Longitudinal Study

|                               |                                                                                                                                                                                                               |
|-------------------------------|---------------------------------------------------------------------------------------------------------------------------------------------------------------------------------------------------------------|
| Journal:                      | <i>BMJ Open</i>                                                                                                                                                                                               |
| Manuscript ID                 | bmjopen-2023-075834                                                                                                                                                                                           |
| Article Type:                 | Original research                                                                                                                                                                                             |
| Date Submitted by the Author: | 19-May-2023                                                                                                                                                                                                   |
| Complete List of Authors:     | Liu, Huiying; Central South University, Department of Sociology<br>Zhang, Mi; Central South University,<br>Zhang, Xinyan; Central South University, Department of Sociology<br>Zhao, Xinyi; Peking University |
| Keywords:                     | Aging, GERIATRIC MEDICINE, Surveys and Questionnaires                                                                                                                                                         |
|                               |                                                                                                                                                                                                               |

SCHOLARONE™  
Manuscripts

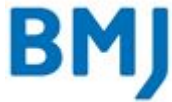

I, the Submitting Author has the right to grant and does grant on behalf of all authors of the Work (as defined in the below author licence), an exclusive licence and/or a non-exclusive licence for contributions from authors who are: i) UK Crown employees; ii) where BMJ has agreed a CC-BY licence shall apply, and/or iii) in accordance with the terms applicable for US Federal Government officers or employees acting as part of their official duties; on a worldwide, perpetual, irrevocable, royalty-free basis to BMJ Publishing Group Ltd ("BMJ") its licensees and where the relevant Journal is co-owned by BMJ to the co-owners of the Journal, to publish the Work in this journal and any other BMJ products and to exploit all rights, as set out in our [licence](#).

The Submitting Author accepts and understands that any supply made under these terms is made by BMJ to the Submitting Author unless you are acting as an employee on behalf of your employer or a postgraduate student of an affiliated institution which is paying any applicable article publishing charge ("APC") for Open Access articles. Where the Submitting Author wishes to make the Work available on an Open Access basis (and intends to pay the relevant APC), the terms of reuse of such Open Access shall be governed by a Creative Commons licence – details of these licences and which [Creative Commons](#) licence will apply to this Work are set out in our licence referred to above.

Other than as permitted in any relevant BMJ Author's Self Archiving Policies, I confirm this Work has not been accepted for publication elsewhere, is not being considered for publication elsewhere and does not duplicate material already published. I confirm all authors consent to publication of this Work and authorise the granting of this licence.

1  
2  
3 TITLE PAGE  
4  
5  
6  
7

8 **Early-Life Adversity Predicts Distinct Trajectories of Multimorbidity**  
9  
10 **with Ageing from 50 to 85 years: A Nationwide Longitudinal Study**  
11  
12  
13  
14

15 Huiying Liu PhD<sup>1</sup>, Mi Zhang BA<sup>1</sup>, Xinyan Zhang BA<sup>1</sup>, Xinyi Zhao, PhD\*<sup>2</sup>  
16  
17

- 18 1. Department of Sociology, Central South University, Changsha, China.  
19  
20 2. School of Health Humanities, Peking University, Beijing, China.  
21  
22  
23

24 **Author Note**  
25

26 We have no conflicts of interest to disclose. This work was supported by the  
27  
28 National Natural Science Foundation of China (grant number 72274222) and the  
29  
30 National Social Science Fund of China (grant number 20&ZD149). The funding  
31  
32 agencies had no direct role in the conduct of the study; the collection, management,  
33  
34 analyses, or interpretation of the data; or preparation or approval of the manuscript.  
35  
36 The protocols of CHARLS were approved by the Ethical Committee of Peking  
37  
38 University. All participants provided informed consent.  
39  
40  
41  
42  
43

44 Correspondence concerning this article should be addressed to Xinyi Zhao,  
45  
46 PhD, School of Health Humanities, Peking University, No. 38 Xueyuan Road, Beijing  
47  
48 100191, China. E-mail: zhaoxinyi@hsc.pku.edu.cn. Telephone number: +86  
49  
50 13811795316.  
51  
52  
53  
54  
55  
56  
57  
58  
59  
60



1  
2  
3  
4 accumulation of more different ELA experiences was associated with a higher relative  
5  
6 risk of developing more severe multimorbidity trajectories.  
7  
8

9 **Conclusions:** There are heterogeneous long-term trajectories of multimorbidity in  
10 Chinese older adults, and the risk of multimorbidity associated with ELA accumulates  
11 over the lifespan. Our findings highlight the role of a supportive early-life family  
12 environment in promoting health development across the lifespan, advocating for the  
13 integration of life-course approaches to implementing health disparity interventions.  
14  
15  
16  
17  
18  
19  
20  
21  
22  
23

24 **Keywords:** chronic disease development; childhood adversity; Chinese older adults;  
25  
26 longitudinal trajectory  
27  
28  
29  
30  
31  
32

### 33 **Strengths and limitations of this study**

#### 34 **Strengths**

- 35 ● Taking advantage of time-varying data on the history of chronic conditions, we  
36 captured the entire course of individuals' development of multimorbidity from  
37 the first chronic disease onset to old age, with the longest time spanning 35 years.  
38
- 39 ● Our study is among the first to empirically establish the longitudinal association  
40 between ELA and long-term differential multimorbidity trajectories.  
41  
42
- 43 ● Our study linked two important aspects of ELA experiences (specific types and  
44 accumulation of ELA) with multimorbidity trajectories, offering a more nuanced  
45 picture for testing the life-course models concerning the pathways through which  
46  
47  
48  
49  
50  
51  
52  
53  
54  
55  
56  
57  
58  
59  
60  
60 ELA influences health development.

## Limitations

- First, our measures of ELA and multimorbidity were retrospective and based on self-reports, which may introduce recall bias into the data.
- Second, we did not consider the frequency and intensity of ELA, which was limited by data unavailability. Additionally, there may be other protective factors (e.g., resilience) related to multimorbidity could not be included in our study.

## Key Points

- Using population-based longitudinal data, we identified four distinct long-term trajectories of multimorbidity among Chinese older adults.
- Early life adversity was a strong predictor of long-term trajectories of multimorbidity.
- The most prominent health-deteriorating impact of ELA has been found among individuals who reported exposure to food insufficiency and parental quarrel/divorce.
- Individuals who accumulated more types of ELA experiences reported a higher relative risk of developing more severe multimorbidity trajectories.

## INTRODUCTION

Chronic diseases are one of the leading causes of death, placing a huge burden on healthcare systems worldwide [1]. Multimorbidity, defined as the coexistence of two or more chronic conditions, has been observed at an extremely high prevalence in old age[2]. It is estimated that over half of Chinese older adults are living with two or more chronic conditions[3], and this number is expected to increase with continuing population aging and improvements in the survival of people with chronic diseases. Extensive studies have documented a range of adverse outcomes resulting from multimorbidity, including a higher risk of mortality, disability and increased healthcare use [4].

Despite the growing interest in studying multimorbidity and its associated factors, previous research has mostly focused on a list of arbitrarily chosen conditions at a single point or period in time and thus does not cover the complete time-varying picture of multimorbidity [5][6]. Recent research has indicated that older individuals not only show variations in the timing of disease onset but also develop multimorbidity at different rates over time [7][8]. In particular, several studies have successfully identified distinct subgroups of multimorbidity within study populations [9][10][11]. Similar groups emerged across these studies, including a group of older individuals maintaining few conditions, a group characterized by a consistently high number of conditions, and a group of individuals reporting a rapidly increasing number of conditions [12][13]. To our knowledge, however, no study has examined



1  
2  
3  
4 heterogeneous multimorbidity trajectories by longitudinally capturing the  
5  
6 accumulation of chronic conditions throughout the whole period starting from an  
7  
8 individual's first-onset condition to his or her very old age. Identifying such long-term  
9  
10 trajectories will not only enhance the understanding of the development of  
11  
12 multimorbidity but also help prognostic studies better target people at risk of more  
13  
14 severe multimorbidity progression and associated adverse outcomes.  
15  
16  
17  
18  
19  
20  
21

22 Early-life adversity (ELA) has been documented as a potential risk factor for worse  
23  
24 health outcomes, including an increased risk of multimorbidity in old age  
25  
26 [14][15][16]. ELA is commonly defined as exposure to traumatic events such as  
27  
28 parental death, parental divorce, or abuse during childhood [17][18]. According to the  
29  
30 life-course perspective, early-life adversity has long-lasting influences on individuals'  
31  
32 developmental trajectories of health through different pathways [19]. Among various  
33  
34 life-course models, the critical period model asserts that ELA experiences can get  
35  
36 "under the skin" by exerting a powerful influence on individuals' brain architecture  
37  
38 and behavioral development, ultimately leading to systematic differences in health  
39  
40 outcomes later in life [20][21]. A considerable number of studies have demonstrated  
41  
42 that exposure to specific types of ELA (e.g., domestic violence and food deprivation)  
43  
44 is a distal cause of higher risks of multimorbidity across various older populations  
45  
46 [22][23][24][25][26]. The accumulation of risk model is another widely used  
47  
48 life-course model for understanding the mechanisms underlying the association  
49  
50 between ELA and health development. This model suggests that early-life  
51  
52  
53  
54  
55  
56  
57  
58  
59  
60

1  
2  
3  
4 disadvantages increase one's exposure to later health risks, forming what is known as  
5  
6 the "chain of risk" of health in adulthood [19][20]. Risk factors at different life stages  
7  
8 may also accumulate over time because of the "chain of risk" where one adverse  
9  
10 experience tends to lead to another. Empirical evidence supporting this model has  
11  
12 revealed that individuals who experienced four or more accumulated ELA reported  
13  
14 increased risks of multimorbidity and developing specific chronic conditions (e.g.,  
15  
16 dyslipidemia and psychiatric disease) compared with those who did not experience  
17  
18 ELA [27]. To our knowledge, however, no existing studies have simultaneously  
19  
20 examined the critical period model and the accumulation of risk model by linking the  
21  
22 two aspects of ELA experiences (types and accumulation) with long-term distinct  
23  
24 trajectories of multimorbidity.  
25  
26  
27  
28  
29  
30  
31  
32  
33  
34

35 Using population-based longitudinal data, the present study aimed to identify  
36  
37 long-term heterogeneous trajectories of multimorbidity among Chinese older adults  
38  
39 starting in late adulthood and followed up to 35 years and to examine the relationship  
40  
41 between exposure to ELA (including specific types of adversity and accumulation of  
42  
43 different adversities) and these long-term multimorbidity trajectories. Drawing from  
44  
45 the life-course perspective and the existing literature, we expected that exposure to  
46  
47 certain types of ELA and the accumulation of more different ELA types would be  
48  
49 associated with a higher likelihood of more severe multimorbidity trajectories.  
50  
51  
52  
53  
54  
55  
56  
57  
58  
59  
60

## METHODS

### Data and Sampling

Data used in the present study were derived from the four waves (2011-2018) of the China Health and Retirement Longitudinal Study (CHARLS) and the 2014 Life History Survey. The 2011 baseline survey collected data from 17,706 respondents aged 45 and above on their demographic, socioeconomic and health characteristics. The 2014 Life History Survey interviewed respondents who participated in the 2011 and 2013 surveys and collected information on their early-life experiences, including living environment, family socioeconomic status, and health history. For the purpose of the present study, we restricted our analytical sample to respondents who met the following inclusion criteria: (1) participated in the 2018 wave and the 2014 Life History survey; (2) birth-year information was available from any of the 2011-2018 waves; (3) provided valid data on the measurement of early life adversity and history of chronic conditions; and (4) aged  $\geq 60$  years in 2018. In addition, we excluded respondents aged over 85 in 2018 because the oldest-old group was not well represented in the CHARLS (the proportion of respondents aged over 85 in the 2018 CHARLS survey was 1.6%). The final analytical sample included 9,112 respondents (please see *Figure 1* for details about the sample selection process).

<insert Figure 1 about here>

## Variables

### *Development of chronic conditions*

We obtained information about each respondent's history of chronic conditions from the 2011-2018 CHARLS survey. In each survey, respondents were asked if they had been diagnosed by a healthcare provider with any of the following 14 chronic conditions: hypertension, dyslipidemia, diabetes, cancer or malignant tumor, chronic lung diseases, liver disease, heart disease, stroke, kidney disease, stomach or other digestive diseases, arthritis or rheumatism, asthma, emotional or psychiatric problems, and memory-related disorders. For each condition, respondents who answered in the affirmative were then asked to report the year when this condition was first diagnosed. Using the self-reported information on the starting year of each condition, we calculated the age at onset of each chronic condition for each respondent. Given that most studies on chronic conditions used age 50 as a starting point and the high prevalence of chronic conditions in people over 50, we tracked each individual's chronic conditions from the age of 50 [28][29]. Then, the time-varying variable "development of chronic conditions" was generated for each respondent, indicating his or her total number of chronic conditions being diagnosed in each year between the age of 50 and the current age when participating in the 2018 CHARLS survey. For more details about the distribution of this time-varying variable, please see *eFigure 1*. This variable was further used for the identification of distinctive long-term multimorbidity trajectories within this population.

### ***Early Life Adversity***

We extracted eight indicators of early life adversity (ELA) from the CHARLS 2014 survey, including parental illness, parental death, parental quarrel/divorce, relative poverty, food insufficiency, domestic violence, and bullying. The detailed questionnaire items and definitions of each ELA indicator are available in *eTable 1*. Responses to each item were dichotomized and summed to generate a cumulative ELA score for each respondent, ranging from 0 to 7. Higher scores indicated more experience with ELA. To investigate the relationship between the accumulation of different ELA experiences and the long-term trajectories of multimorbidity, we further categorized the accumulation of ELA experiences according to ELA scores: none, 1-2, 3-4, and 5-7 types of ELA experience accumulation. The measurement has been accepted and widely used in empirical studies [30].

### ***Covariates***

This study included the following covariates: (1) demographic characteristics included gender, residence area (urban versus rural), and marital status (married versus other status (unmarried/divorced/separated/widowed)); (2) socioeconomic characteristics included educational attainment (below high school versus high school and above), whether receiving *Dibao* assistance, and types of medical insurance (none, urban employee, urban and rural resident, and others); and (3) health behaviors included smoking, drinking, and physical activity (no-, light-, moderate- and vigorous-intensity physical activity).

## Patient and public involvement

Patients and/or the public were not involved in the design, or conduct, or reporting, or dissemination plans of this research.

## Analytical Strategy

The group-based trajectory modeling (GBTM) approach was used to model progression in the number of chronic conditions over time (i.e., from late adulthood to old age) [31][32][33]. The fundamental concept of interest is the distribution of outcomes (in our study, the number of chronic conditions) conditional on age. Maximum-likelihood methods were used for the estimation of the model parameters, and a censored normal (CNORM) model was selected given the continuous nature of targeted outcomes [34][35]. Following the standard procedure for applying this approach, we conducted a sequence of GBTM models. For model selection, we used the following model-fit indices and statistical criteria in combination with conceptual considerations of group distinctiveness and interpretability: (a) the Bayesian Information Criteria (BIC) values were compared between the different models, with a smaller BIC value indicating a better-fit model; (b) the average posterior probability of group assignment that measures the probability of a group individual belonging to this specific trajectory group was set at greater than 0.7; and (c) according to the posterior probability of the group member, a minimum membership of 5% is required in each trajectory group[36]. After identifying the optimal number of trajectory groups, univariate analysis was used to test the differences in trajectory groups from

1  
2  
3  
4 the final model among a range of individual characteristics at baseline. Multivariate  
5  
6 logistic models were used to assess the association between ELA and trajectory group  
7  
8 memberships.  
9

## 14 RESULTS

### 17 Sample Characteristics by ELA Number in Older Adults

19 Table 1 shows the characteristics of individuals (measured in the 2018 CHARLS  
20 survey) by the accumulation of ELA experiences (none, 1 to 2 types, 3 to 4 types, and  
21 5 to 7 types). Among individuals with three or more chronic conditions, the  
22 proportion of individuals who reported 5 to 7 types of ELA accumulation (57.2%)  
23 was significantly higher than that of those who reported less types of ELA  
24 accumulation (none, 1 to 2, and 3 to 4 types). Individuals from the four accumulation  
25 groups of ELA experiences significantly differ in their demographic, socioeconomic  
26 characteristics and health behaviors.  
27  
28  
29  
30  
31  
32  
33  
34  
35  
36  
37  
38

39  
40 <insert Table 1 about here>  
41  
42  
43  
44

### 45 Long-term Trajectories of Multimorbidity among Older Adults

47  
48 We used the GBTM approach to identify distinct groups of individuals sharing a  
49 similar long-term trajectory of multimorbidity from age 50 to 85. Models were  
50 estimated with one to six groups (Table 2). For Groups 1-4, the BICs were  
51 consistently close to 0. The entropy in group 4 was 0.976. Based on considerations of  
52 changes in BIC and entropy, a logit model with four trajectory groups was the most  
53  
54  
55  
56  
57  
58  
59  
60

1  
2  
3  
4 suitable fit for the data.  
5

6 <insert Table 2 about here>  
7  
8

9 Figure 2 illustrates the distribution of older individuals from the four identified  
10 long-term trajectories of multimorbidity. The number of chronic conditions in Group  
11 1 (“maintaining-low”) was consistently low, with most remaining free of chronic  
12 conditions until age 75. Older individuals in Group 2 (“low onset-rapidly increasing”)  
13 had no chronic condition at the starting point, but their number of chronic conditions  
14 showed a rapid increase after age 65. Older individuals in Group 3 (“middle  
15 onset-moderately increasing”) had one chronic condition at the starting point, and  
16 their number of chronic conditions increased steadily with age. Older adults in Group  
17 4 (“chronically-high”) had two chronic conditions at the starting point, with the  
18 number of chronic conditions increasing rapidly with age. Please see the  
19 *Supplemental Tables* for more information on the characteristics of the long-term  
20 trajectory distribution of multimorbidity.  
21  
22  
23  
24  
25  
26  
27  
28  
29  
30  
31  
32  
33  
34  
35  
36  
37  
38  
39

40 <insert Figure 2 about here>  
41  
42  
43  
44

#### 45 **Early Life Adversity Predicts Long-term Trajectories of Multimorbidity**

46 Model 1 in Table 3 presents the results of the multinomial logistic regressions for the  
47 relationship between specific types of ELA and multimorbidity trajectories. Exposure  
48 to parental illness, parental quarrel/divorce, relative poverty, food insufficiency,  
49 domestic violence, and bullying were associated with more severe long-term  
50 trajectories of multimorbidity. Individuals who had experienced parental  
51  
52  
53  
54  
55  
56  
57  
58  
59  
60



1  
2  
3  
4 quarrel/divorce reported a higher relative risk of being in the “low onset-rapidly  
5  
6 increasing” group, the “middle onset-moderately increasing” group, and the  
7  
8 “chronically-high” group than in the “maintaining-low” group. Similar results have  
9  
10 also been found among individuals who reported childhood food insufficiency.  
11  
12  
13  
14  
15  
16

17 Model 2 presents the results of the multinomial logistic regressions for the  
18  
19 relationship between the accumulation of different ELA experiences and  
20  
21 multimorbidity trajectories. Individuals who had accumulated 1 to 2 types, 3 to 4  
22  
23 types, and 5-7 types of ELA experiences reported a higher relative risk of being in the  
24  
25 “low onset-rapidly increasing” group, the “middle onset-moderately increasing”  
26  
27 group, and the “chronically-high” group than in the “maintaining-low” group.  
28  
29  
30  
31  
32  
33  
34

### 35 **Sensitivity Analyses**

36  
37 Supplemental Tables (*eTables 2 and 4-8*) show the results of sensitivity analyses that  
38  
39 included restricting the GBTM analyses to 12 chronic conditions (excluding  
40  
41 memory-related and emotional/psychiatric problems given their low prevalence in the  
42  
43 study population), using a different set of ELA indicators or different categorization  
44  
45 for the accumulation of ELA, and stratifying by gender and urban-rural residence.  
46  
47  
48  
49

50 <insert Table 3 about here>  
51  
52  
53  
54

## 55 **DISCUSSION**

56  
57  
58 Using population-based longitudinal data, we identified four distinct long-term  
59  
60

1  
2  
3  
4 trajectories of multimorbidity development among Chinese older adults and linked  
5  
6 different types and accumulation of ELA experiences with these long-term  
7  
8 multimorbidity trajectories. The most prominent health-deteriorating impact of ELA  
9  
10 has been found among individuals who reported exposure to food insufficiency and  
11  
12 parental quarrel/divorce. Individuals who had accumulated different ELA experiences  
13  
14 had a significantly higher relative risk of developing more severe multimorbidity  
15  
16 trajectories over time.  
17  
18  
19  
20  
21  
22  
23

24 The development of multimorbidity in older adults has been widely reported, but only  
25  
26 a few studies have examined the heterogeneity of multimorbidity trajectories in older  
27  
28 adults[37][12]. Our findings confirmed the existence of heterogeneous long-term  
29  
30 multimorbidity trajectories in Chinese older adults. The “maintaining-low” (19.1%)  
31  
32 group and the “low onset-rapidly increasing” (22%) group were both characterized by  
33  
34 a low starting point, whereas the “low onset-rapidly increasing” group reported the  
35  
36 onset of diseases around the age of 65 and a faster development of new disease  
37  
38 diagnosis since the age of 80. A similar trajectory of health development in later life  
39  
40 has been consistently reported in previous studies among older Chinese populations  
41  
42 across a variety of health outcomes, including frailty and functional disability  
43  
44 (e.g.,[38][39]). Individuals from the largest group “middle onset-moderately  
45  
46 increasing” (40.2%) were characterized by an average of one condition in their 50 s  
47  
48 and a gradual progression of new condition diagnosis over time. Female and  
49  
50 individuals with below high school education were more likely to be located in this  
51  
52  
53  
54  
55  
56  
57  
58  
59  
60

1  
2  
3  
4 group. The “chronically-high” group comprised individuals with the highest number  
5  
6 of conditions throughout the age range from 50 to 85, accounting for approximately  
7  
8 20% of the study population. Such a similar group has also been found in several  
9  
10 previous studies [12][13], with an estimated proportion ranging between 7.5% and  
11  
12  
13  
14 27.8%.

15  
16  
17  
18  
19 Our findings indicated that exposure to specific types of ELA was associated with  
20  
21 more severe long-term multimorbidity trajectories. The most prominent  
22  
23 health-deteriorating impact of ELA on multimorbidity progression was found among  
24  
25 individuals who had experienced childhood food insufficiency and parental  
26  
27 quarrel/divorce. Specifically, our finding was consistent with previous studies linking  
28  
29 childhood food insufficiency with a variety of adverse health outcomes in later life,  
30  
31 such as a higher risk of hyperglycemia, cognitive decline, and frailty[40][41][42][43].  
32  
33 Additionally, our finding of the harmful effects of parental quarrel/divorce on  
34  
35 long-term multimorbidity trajectories extended the literature on the importance of  
36  
37 early-life dysfunctional family relationships for physical and mental health in  
38  
39 adulthood[44][45]. By linking specific types of ELA experiences with the  
40  
41 longitudinal development of multimorbidity, our study provided new evidence for the  
42  
43 critical-period model that childhood adverse experiences may exert long-lasting,  
44  
45 irreversible health-damaging effects that lead to significant health disparities in old  
46  
47 age [22][24][27].  
48  
49  
50  
51  
52  
53  
54  
55  
56  
57  
58  
59  
60

1  
2  
3  
4 Previous studies have also documented associations between the accumulation of  
5  
6 different ELA experiences and an increased risk of multimorbidity[46] [23]. The  
7  
8 current study makes a further contribution by linking the accumulation of different  
9  
10 ELA experiences with distinctive long-term trajectories of multimorbidity. Our  
11  
12 findings supported our hypothesis that individuals who experienced more  
13  
14 accumulated ELA were more likely to develop a more severe multimorbidity  
15  
16 trajectory over time. This finding was consistent with the accumulation of risk model  
17  
18 [47], suggesting that cumulative disadvantages of ELA may contribute to the  
19  
20 persistent widening of health inequalities [29]. Initial disadvantages may contribute to  
21  
22 how individuals are exposed to subsequent risk factors, thus leading to greater  
23  
24 disparities in health status in later life[48] [49]. For example, family socioeconomic  
25  
26 vulnerabilities and maladaptation may cause interruption of education in adolescence,  
27  
28 which subsequently increases the risk of exposure to new adversities in adulthood,  
29  
30 such as unemployment, and limits the potential opportunities for upward mobility  
31  
32 [49].  
33  
34  
35  
36  
37  
38  
39  
40  
41  
42  
43  
44  
45  
46  
47  
48  
49  
50  
51  
52  
53  
54  
55  
56  
57  
58  
59  
60

Our study has some key strengths. First, taking advantage of time-varying data on the history of chronic conditions, we captured the entire course of individuals' development of multimorbidity from the first chronic disease onset to old age, with the longest time spanning 35 years. Second, our study is among the first to empirically establish the longitudinal association between ELA and long-term differential multimorbidity trajectories. Third, our study linked two important aspects of ELA

1  
2  
3  
4 experiences (specific types and accumulation of ELA) with multimorbidity  
5  
6 trajectories, offering a more nuanced picture for testing the life-course models  
7  
8 concerning the pathways through which ELA influences health development.  
9  
10 Nevertheless, this study also has some limitations. First, our measures of ELA and  
11  
12 multimorbidity were retrospective and based on self-reports, which may introduce  
13  
14 recall bias into the data. Second, we did not consider the frequency and intensity of  
15  
16 ELA, which was limited by data unavailability. Additionally, there may be other  
17  
18 protective factors (e.g., resilience) related to multimorbidity could not be included in  
19  
20 our study.  
21  
22  
23  
24  
25  
26  
27  
28  
29

30 In conclusion, our study indicated that the development of multimorbidity shows  
31  
32 considerable heterogeneity within the older Chinese population with respect to the  
33  
34 onset and increased rate of conditions, and such heterogeneity can be explained by  
35  
36 ELA experiences. The findings highlight the role of a supportive early-life family  
37  
38 environment in promoting health development across the adult lifespan. Practitioners  
39  
40 and clinicians should pay more attention to the upstream factors in which adult  
41  
42 disease development is rooted when delivering health care services and psychosocial  
43  
44 interventions serving older people in the community[50].  
45  
46  
47  
48  
49  
50  
51  
52  
53  
54  
55  
56  
57  
58  
59  
60

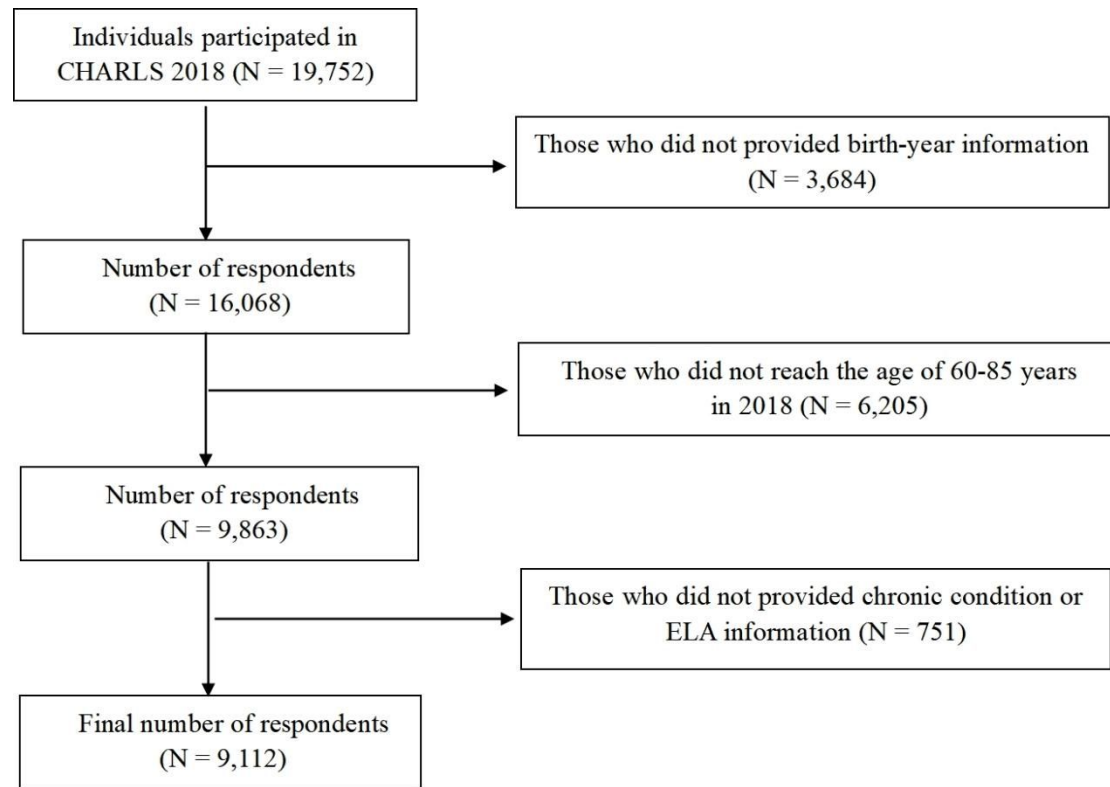

**Figure 1 Flow of Respondents and Study Inclusion.**

N = number; CHARLS = China Health and Retirement Longitudinal Survey

**Table 1 Sample Characteristics by ELA Number in CHARLS 2018 (N=9,112)**

| Variables (%)                     | ELA Number |      |      |      | P-value |
|-----------------------------------|------------|------|------|------|---------|
|                                   | 0          | 1-2  | 3-4  | 5-7  |         |
| Number of Chronic Conditions      |            |      |      |      | <0.001  |
| 0-1 condition                     | 38.2       | 33.7 | 28.2 | 21.8 |         |
| 2 conditions                      | 19.5       | 22.8 | 21.5 | 21.1 |         |
| ≥ 3 conditions                    | 42.3       | 43.5 | 50.3 | 57.2 |         |
| Female                            | 63.2       | 56.2 | 46.3 | 44.7 | <0.001  |
| Rural                             | 57.7       | 60.8 | 65.7 | 70.8 | <0.001  |
| Marital Status                    |            |      |      |      | <0.001  |
| married                           | 71.7       | 78.1 | 80.3 | 81.3 |         |
| other status                      | 28.3       | 21.9 | 19.7 | 18.8 |         |
| Educational Attainment            |            |      |      |      | 0.001   |
| below high school                 | 87.2       | 88.8 | 91.0 | 92.1 |         |
| high school and above             | 12.8       | 11.2 | 9.0  | 7.9  |         |
| Receiving <i>Dibao</i> Assistance | 89.2       | 91.7 | 89.1 | 87.6 | <0.001  |
| Types of Medical Insurance        |            |      |      |      | 0.001   |
| none                              | 3.9        | 2.9  | 2.7  | 2.8  |         |
| urban employee                    | 16.1       | 13.4 | 13.2 | 9.3  |         |
| urban and rural resident          | 76.6       | 81.1 | 81.9 | 86.3 |         |
| others                            | 3.5        | 2.6  | 2.2  | 1.6  |         |
| Smoking                           | 65.1       | 58.4 | 51.4 | 51.1 | <0.001  |
| Drinking                          | 72.6       | 67.9 | 63.1 | 61.5 | <0.001  |
| Physical Activity                 |            |      |      |      | <0.001  |
| none                              | 15.7       | 14.2 | 11.8 | 9.5  |         |
| low intensity                     | 40.0       | 35.5 | 31.1 | 26.8 |         |
| moderate intensity                | 29.3       | 27.5 | 26.9 | 26.4 |         |
| high intensity                    | 15.0       | 22.8 | 30.2 | 37.2 |         |

Notes: ELA = early life adversity. The information is from the China Health and Retirement Longitudinal Study 2018. Other status of marriage includes unmarried/divorced/separated/widowed. Urban and rural resident medical insurance integrated urban resident medical insurance and new rural cooperative medical insurance. The results of the chi-square test for variables.

**Table 2 Tabulated BIC and 2ΔBIC**

| Number of Groups | BIC        | Entropy | 2( Δ BIC) |
|------------------|------------|---------|-----------|
| 1                | -308557.37 | --      | --        |
| 2                | -253000.24 | 0.967   | -55557.13 |
| 3                | -226640.40 | 0.975   | -26359.84 |
| 4                | -213163.38 | 0.976   | -13477.02 |
| 5                | -201166.33 | 0.973   | -11997.05 |
| 6                | -193334.26 | 0.941   | -7832.07  |

Notes: N=9,112. BIC = Bayesian Information Criterion. The closer the entropy is to 1, the better the model fits.

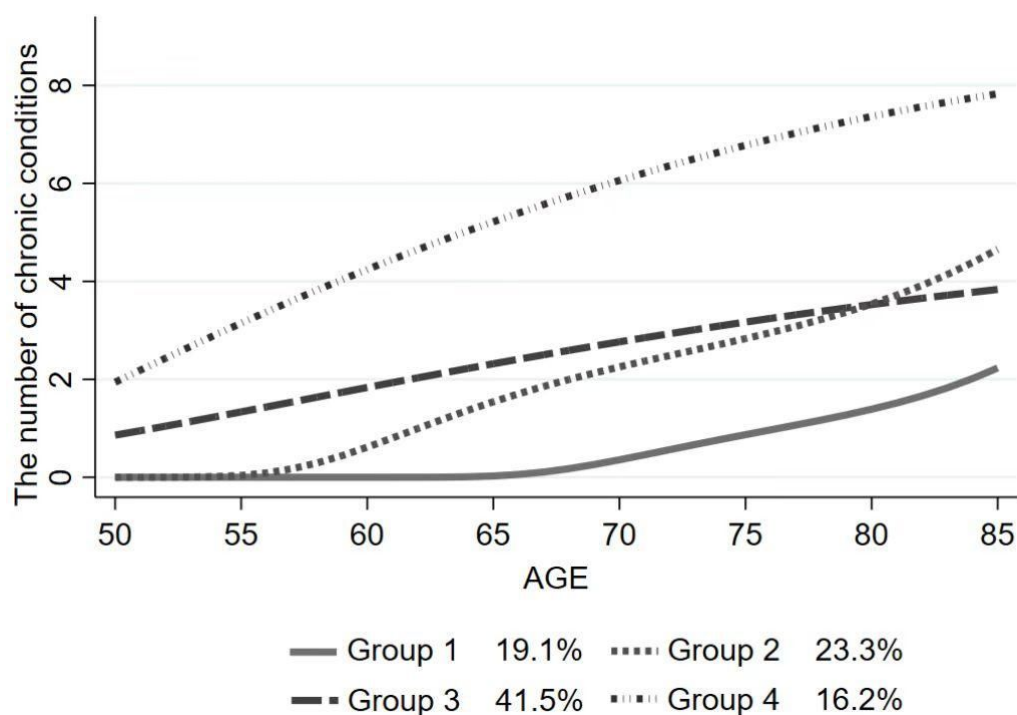

**Figure 2 Long-term Trajectories Distribution of Multimorbidity**



**Table 3 Multinomial Logistic Regressions for ELA Experiences and Multimorbidity Trajectories**

| Variables                | Group 2                      | Group 3                            | Group 4                 |
|--------------------------|------------------------------|------------------------------------|-------------------------|
|                          | Low onset-rapidly increasing | Middle onset-moderately increasing | Chronically-high        |
|                          | RRR (95% CI)                 | RRR (95% CI)                       | RRR (95% CI)            |
| <b>Model 1</b>           |                              |                                    |                         |
| Parental Illness         | 1.059 (0.891-1.258)          | 1.230 (1.054-1.435)**              | 1.885 (1.578-2.251)***  |
| Parental Death           | 1.032 (0.876-1.215)          | 1.013 (0.874-1.174)                | 0.980 (0.816-1.176)     |
| Parental Quarrel/Divorce | 1.214 (1.011-1.458)*         | 1.181 (1.000-1.394)*               | 1.262 (1.038-1.536)*    |
| Relative Poverty         | 1.092 (0.944-1.264)          | 1.210 (1.061-1.379)**              | 1.333 (1.136-1.564)***  |
| Food Insufficiency       | 1.403 (1.197-1.645)***       | 1.372 (1.190-1.582)***             | 1.780 (1.472-2.152)***  |
| Domestic Violence        | 1.132 (0.982-1.305)          | 1.340 (1.178-1.523)***             | 1.597 (1.360-1.876)***  |
| Bullying                 | 1.051 (0.889-1.243)          | 1.215 (1.046-1.411)*               | 1.443 (1.208-1.724)***  |
| <b>Model 2</b>           |                              |                                    |                         |
| ELA (ref: none)          |                              |                                    |                         |
| 1-2                      | 1.694 (1.284-2.233)***       | 1.512 (1.189-1.922)**              | 1.975 (1.384-2.819)***  |
| 3-4                      | 2.066 (1.557-2.741)***       | 2.148 (1.680-2.746)***             | 3.746 (2.621-5.355)***  |
| 5-7                      | 2.625 (1.836-3.755)***       | 3.427 (2.505-4.690)***             | 7.555 (4.993-11.431)*** |

Notes: Reference category was Group 1 (“maintaining-low”). RRR = relative risk ratios. CI = confidence interval. ELA = early life adversity. ref =reference. \*p < .05; \*\*p < .01; \*\*\*p < .001. Model adjusted for gender, residence area, marital status, educational attainment, types of medical insurance, and whether receive *Dibao* assistance, smoking, drinking, and physical activity.

## References

1. Boyd C, Smith CD, Masoudi FA et al. Decision Making for Older Adults With Multiple Chronic Conditions: Executive Summary for the American Geriatrics Society Guiding Principles on the Care of Older Adults With Multimorbidity: ACTION STEPS FOR DECISION MAKING WITH MULTIMORBIDITY. *J Am Geriatr Soc* 2019;67:665–73. <https://doi.org/10.1111/jgs.15809>.
2. Maresova P, Javanmardi E, Barakovic S et al. Consequences of chronic diseases and other limitations associated with old age – a scoping review. *BMC Public Health* 2019;19:1431.
3. Yao S-S, Cao G-Y, Han L et al. Prevalence and Patterns of Multimorbidity in a Nationally Representative Sample of Older Chinese: Results From the China Health and Retirement Longitudinal Study. Newman A (ed.). *The Journals of Gerontology: Series A* 2020;75:1974–80. <https://doi.org/10.1093/gerona/glz185>.
4. Anderson E, Durstine JL. Physical activity, exercise, and chronic diseases: A brief review. *Sports Medicine and Health Science* 2019;1:3–10. <https://doi.org/10.1016/j.smhs.2019.08.006>.
5. Strauss VY, Jones PW, Kadam UT et al. Distinct trajectories of multimorbidity in primary care were identified using latent class growth analysis. *Journal of Clinical Epidemiology* 2014;67:1163–71.
6. Hanson HA, Smith KR, Zimmer Z. Reproductive History and Later-Life Comorbidity Trajectories: A Medicare-Linked Cohort Study From the Utah Population Database. *Demography* 2015;52:2021–49. <https://doi.org/10.1016/j.jclinepi.2014.06.003>.
7. Quiñones AR, Botosaneanu A, Markwardt S et al. Racial/ethnic differences in multimorbidity development and chronic disease accumulation for middle-aged adults. Ginsberg SD (ed.). *PLoS ONE* 2019;14:e0218462. <https://doi.org/10.1371/journal.pone.0218462>.
8. Kudesia P, Salimrouny B, Stanley M et al. The incidence of multimorbidity and patterns in accumulation of chronic conditions: A systematic review. *Journal of Multimorbidity and Comorbidity* 2021;11:263355652110328. <https://doi.org/10.1177/26335565211032880>.
9. Vetrano DL, Roso-Llorach A, Fernández S et al. Twelve-year clinical trajectories of multimorbidity in a population of older adults. *Nat Commun* 2020;11:3223.
10. Liu H, Zhang X, Chen B et al. The Differential Impact of Multimorbidity Patterns and Subsequent Accumulation on Longitudinal Trajectories of Physical Function Decline in a Population-Based Cohort of Older People. Fielding R (ed.). *The Journals of Gerontology: Series A* 2022;77:1629–36. <https://doi.org/10.1093/gerona/glab384>.
11. Zhang Z, Yuan M, Shi K et al. Association between multimorbidity trajectories, healthcare utilization, and health expenditures among middle-aged and older adults:

- 1  
2  
3  
4  
5 China Health and Retirement Longitudinal Study. *Journal of Affective Disorders*  
6 2023;330:24–32. <https://doi.org/10.1016/j.jad.2023.02.135>.  
7
- 8 12. Lee SA, Joo S, Chai HW et al. Patterns of multimorbidity trajectories and their correlates  
9 among Korean older adults. *Age and Ageing* 2021;50:1336–41.  
10 <https://doi.org/10.1093/ageing/afab002>.  
11
- 12 13. Kim J-H, Rhee Y, Lee Y. Longitudinal changes in comorbidity patterns over time in  
13 relation to mortality in older Korean adults. *Archives of Gerontology and Geriatrics*  
14 2018;79:63–8. <https://doi.org/10.1016/j.archger.2018.08.004>.  
15
- 16 14. Kuh D, Ben-Shlomo Y eds. *A Life Course Approach to Chronic Disease Epidemiology*.  
17 Oxford ; New York: Oxford University Press, 1997.  
18
- 19 15. Li Y, Xue Q L, Odden M C, et al. Linking early life risk factors to frailty in old age:  
20 evidence from the China Health and Retirement Longitudinal Study. *Age and ageing*,  
21 2020, 49(2): 208-217. <https://doi.org/10.1093/ageing/afz160>.  
22
- 23 16. Mosley-Johnson E, Garacci E, Wagner N, et al. Assessing the relationship between  
24 adverse childhood experiences and life satisfaction, psychological well-being, and social  
25 well-being: United States Longitudinal Cohort 1995 - 2014. *Quality of Life Research*,  
26 2019, 28: 907-914. <https://doi.org/10.1007/s11136-018-2054-6>.  
27
- 28 17. Fristad, MA, Jedel R, Weller, RA, Weller, EB. Psychosocial functioning in children after  
29 the death of a parent. *The American Journal of Psychiatry* 1993;3: 511–513.  
30 <https://doi.org/10.1176/ajp.150.3.511>.  
31
- 32 18. McLaughlin KA, Sheridan MA, Lambert HK. Childhood adversity and neural  
33 development: Deprivation and threat as distinct dimensions of early experience.  
34 *Neuroscience & Biobehavioral Reviews* 2014;47:578–91.  
35 <https://doi.org/10.1016/j.neubiorev.2014.10.012>.  
36
- 37 19. Lynch J, Smith GD. A LIFE COURSE APPROACH TO CHRONIC DISEASE  
38 EPIDEMIOLOGY. *Annu Rev Public Health* 2005;26:1–35.  
39 <https://doi.org/10.1146/annurev.publhealth.26.021304.144505>.  
40
- 41 20. Ben-Shlomo Y, Kuh D. A life course approach to chronic disease epidemiology:  
42 conceptual models, empirical challenges and interdisciplinary perspectives. *International*  
43 *journal of epidemiology* 2002, 2: 285-293. <https://doi.org/10.1093/ije/31.2.285>.  
44
- 45 21. Fox SE, Levitt P, Nelson III CA. How the Timing and Quality of Early Experiences  
46 Influence the Development of Brain Architecture. *Child Development* 2010;81:28–40.  
47 <https://doi.org/10.1111/j.1467-8624.2009.01380.x>.  
48
- 49 22. Henchoz Y, Seematter-Bagnoud L, Nanchen D et al. Childhood adversity: A gateway to  
50 multimorbidity in older age? *Archives of Gerontology and Geriatrics* 2019;80:31–7.  
51 <https://doi.org/10.1016/j.archger.2018.10.003>.  
52
- 53 23. Sonu S, Post S, Feinglass J. Adverse childhood experiences and the onset of chronic  
54  
55  
56  
57  
58  
59  
60

- disease in young adulthood. *Preventive Medicine* 2019;123:163–70.  
<https://doi.org/10.1016/j.ypmed.2019.03.032>.
24. Yang L, Hu Y, Silventoinen K et al. Childhood adversity and trajectories of multimorbidity in mid-late life: China health and longitudinal retirement study. *J Epidemiol Community Health* 2021;75:593–600.  
<http://dx.doi.org/10.1136/jech-2020-214633>.
25. Buhrmann A S, Fuller-Thomson E. Poorer physical and mental health among older adults decades after experiencing childhood physical abuse. *Aging and health research*, 2022, 2(3): 100088. <https://doi.org/10.1016/j.ahr.2022.100088>.
26. Grey K, Gonzales G B, Abera M, et al. Severe malnutrition or famine exposure in childhood and cardiometabolic non-communicable disease later in life: a systematic review. *BMJ global health*, 2021, 6(3): e003161.  
<http://dx.doi.org/10.1136/bmjgh-2020-003161>.
27. Lin L, Wang HH, Lu C et al. Adverse Childhood Experiences and Subsequent Chronic Diseases Among Middle-aged or Older Adults in China and Associations With Demographic and Socioeconomic Characteristics. *JAMA Netw Open* 2021;4:e2130143.  
<https://doi.org/10.1001/jamanetworkopen.2021.30143>.
28. Koyanagi A, Garin N, Olaya B et al. Chronic Conditions and Sleep Problems among Adults Aged 50 years or over in Nine Countries: A Multi-Country Study. Xia Y (ed.). *PLoS ONE* 2014;9:e114742. <https://doi.org/10.1371/journal.pone.0114742>.
29. Watson KB, Carlson SA, Gunn JP et al. Physical Inactivity Among Adults Aged 50 Years and Older — United States, 2014. *MMWR Morb Mortal Wkly Rep* 2016;65:954–8. <https://www.jstor.org/stable/24858967>.
30. Shi Z L, Wu Z M. The long term consequences of early life misfortune on health inequality. *Sociological Studies*, 2018, 33(3): 166-194.  
<https://doi.org/10.19934/j.cnki.shxyj.2018.03.008>.
31. Jones BL, Nagin DS. Advances in Group-Based Trajectory Modeling and an SAS Procedure for Estimating Them. *Sociological Methods & Research* 2007;35:542–71.  
<https://doi.org/10.1177/0049124106292364>.
32. Nagin D S. Analyzing developmental trajectories: a semiparametric, group-based approach. *Psychological methods*, 1999, 4(2): 139.  
<https://doi.org/10.1037/1082-989X.4.2.139>.
33. Nagin D S, Jones B L, Passos V L, et al. Group-based multi-trajectory modeling. *Statistical methods in medical research*, 2018, 27(7): 2015-2023.  
<https://doi.org/10.1177/0962280216673085>.
34. Haviland AM, Jones BL, Nagin DS. Group-based Trajectory Modeling Extended to Account for Nonrandom Participant Attrition. *Sociological Methods & Research*

- 2011;40:367–90. <https://doi.org/10.1177/0049124111400041>.
35. Nagin D. Group-based modeling of development[M]. Harvard University Press, 2005.
36. Nagin DS. Group-Based Trajectory Modeling: An Overview. In: Piquero AR, Weisburd D (eds.). *Handbook of Quantitative Criminology*. New York, NY: Springer, 2010, 53–67. <https://doi.org/10.1177/0049124111400041>.
37. Jackson CA, Dobson A, Tooth L et al. Body mass index and socioeconomic position are associated with 9-year trajectories of multimorbidity: A population-based study. *Preventive Medicine* 2015;81:92–8. <https://doi.org/10.1016/j.ypmed.2015.08.013>.
38. Su B, Li D, Xie J et al. Chronic Disease in China: Geographic and Socioeconomic Determinants Among Persons Aged 60 and Older. *Journal of the American Medical Directors Association* 2023;24:206-212.e5. <https://doi.org/10.1016/j.jamda.2022.10.002>.
39. Pivetta NRS, Marincolo JCS, Neri AL et al. Multimorbidity, frailty and functional disability in octogenarians: A structural equation analysis of relationship. *Archives of Gerontology and Geriatrics* 2020;86:103931. <https://doi.org/10.1016/j.archger.2019.103931>.
40. Wang J, Li Y, Han X et al. Exposure to the Chinese Famine in Childhood Increases Type 2 Diabetes Risk in Adults. *The Journal of Nutrition* 2016;146:2289–95. <https://doi.org/10.3945/jn.116.234575>.
41. Cohn-Schwartz E, Weinstein G. Early-life food deprivation and cognitive performance among older Europeans. *Maturitas* 2020;141:26–32. <https://doi.org/10.1016/j.maturitas.2020.06.020>.
42. Rong H, Lai X, Mahmoudi E, et al. Early-life exposure to the Chinese famine and risk of cognitive decline. *Journal of clinical medicine*, 2019, 8(4): 484. <https://doi.org/10.3390/jcm8040484>.
43. Ye C, Aihemaitijiang S, Wang R, et al. Associations between early-life food deprivation and risk of frailty of middle-age and elderly people: evidence from the china health and retirement longitudinal study. *Nutrients*, 2021, 13(9): 3066. <https://doi.org/10.3390/nu13093066>.
44. Marsh S, Dobson R, Maddison R. The relationship between household chaos and child, parent, and family outcomes: a systematic scoping review. *BMC Public Health* 2020;20:513.
45. Santini ZI, Koyanagi A, Stewart-Brown S et al. Cumulative risk of compromised physical, mental and social health in adulthood due to family conflict and financial strain during childhood: a retrospective analysis based on survey data representative of 19 European countries. *BMJ Glob Health* 2021;6:e004144. <http://dx.doi.org/10.1136/bmjgh-2020-004144>.
46. McCrory C, Dooley C, Layte R, Kenny RA. The lasting legacy of childhood adversity

- 1  
2  
3  
4  
5 for disease risk in later life. *Health Psychology* 2015;7:687.  
6 <https://doi.org/10.1037/hea0000147>.  
7
- 8 47. Lee C, Park S. Examining Cumulative Inequality in the Association Between Childhood  
9 Socioeconomic Status and Body Mass Index From Midlife to Old Age. Zjacova A (ed).  
10 *The Journals of Gerontology: Series B* 2020;75:1264–74.  
11 <https://doi.org/10.1093/geronb/gbz081>.  
12
- 13 48. Ferraro KF, Shippee TP. Aging and Cumulative Inequality: How Does Inequality Get  
14 Under the Skin? *The Gerontologist* 2009;49:333–43.  
15 <https://doi.org/10.1093/geront/gnp034>.  
16
- 17 49. Nurius PS, Green S, Logan-Greene P et al. Life course pathways of adverse childhood  
18 experiences toward adult psychological well-being: A stress process analysis. *Child*  
19 *Abuse & Neglect* 2015;45:143–53. <https://doi.org/10.1016/j.chiabu.2015.03.008>.  
20
- 21 50. Daelmans B, Darmstadt GL, Lombardi J et al. Early childhood development: the  
22 foundation of sustainable development. *The Lancet* 2017;389:9–11.  
23 [https://doi.org/10.1016/S0140-6736\(16\)31659-2](https://doi.org/10.1016/S0140-6736(16)31659-2).  
24  
25  
26  
27  
28  
29  
30  
31  
32  
33  
34  
35  
36  
37  
38  
39  
40  
41  
42  
43  
44  
45  
46  
47  
48  
49  
50  
51  
52  
53  
54  
55  
56  
57  
58  
59  
60

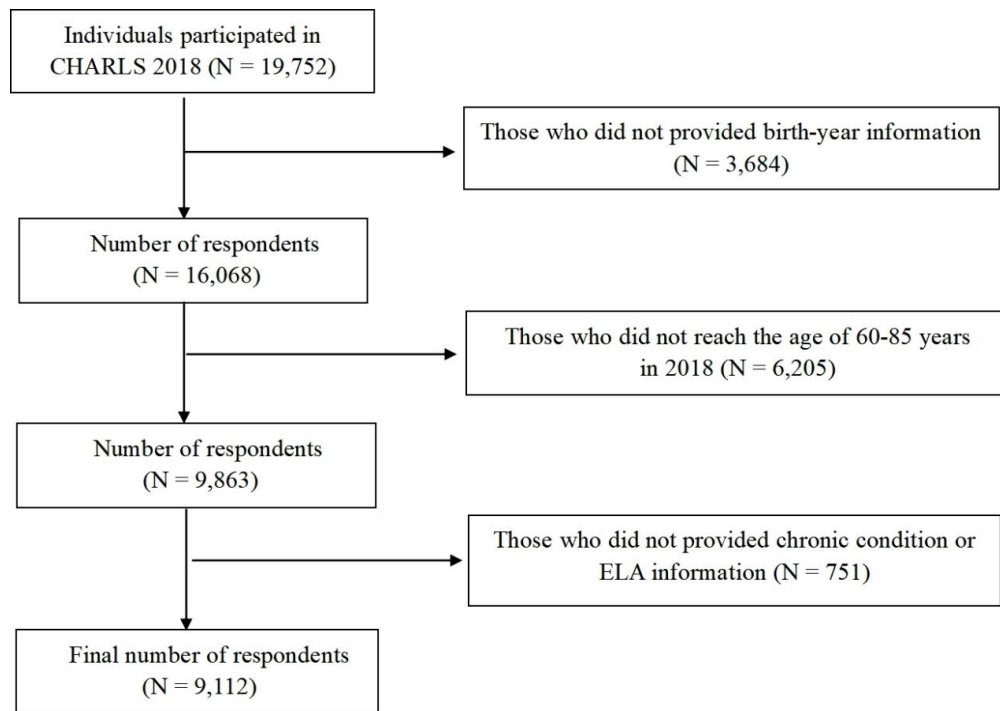

Figure 1 Flow of Respondents and Study Inclusion.  
N = number; CHARLS = China Health and Retirement Longitudinal Survey

146x103mm (220 x 220 DPI)

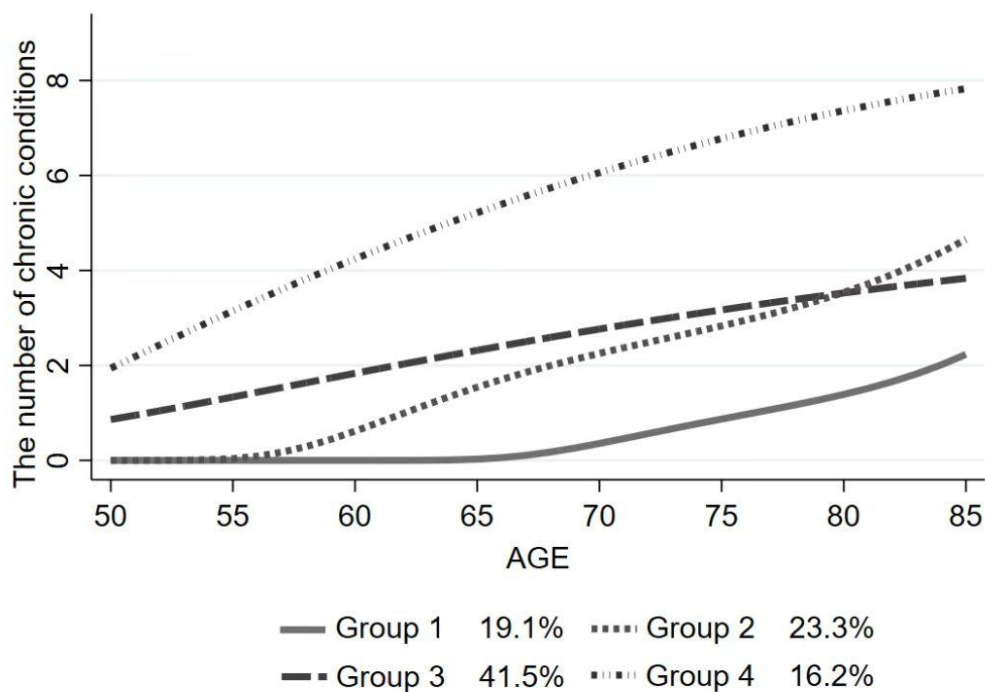

Figure 2 Long-term Trajectories Distribution of Multimorbidity.

136x99mm (192 x 192 DPI)



1  
2  
3  
4  
5  
6  
7  
8  
9  
10  
11  
12  
13  
14  
15  
16  
17  
18  
19  
20  
21  
22  
23  
24  
25  
26  
27  
28  
29  
30  
31  
32  
33  
34  
35  
36  
37  
38  
39  
40  
41  
42  
43  
44  
45  
46  
47  
48  
49  
50  
51  
52  
53  
54  
55  
56  
57  
58  
59  
60

**Supplemental Figures**

**eFigure 1** Retracing the Development of Chronic Disease in the Sample

For peer review only

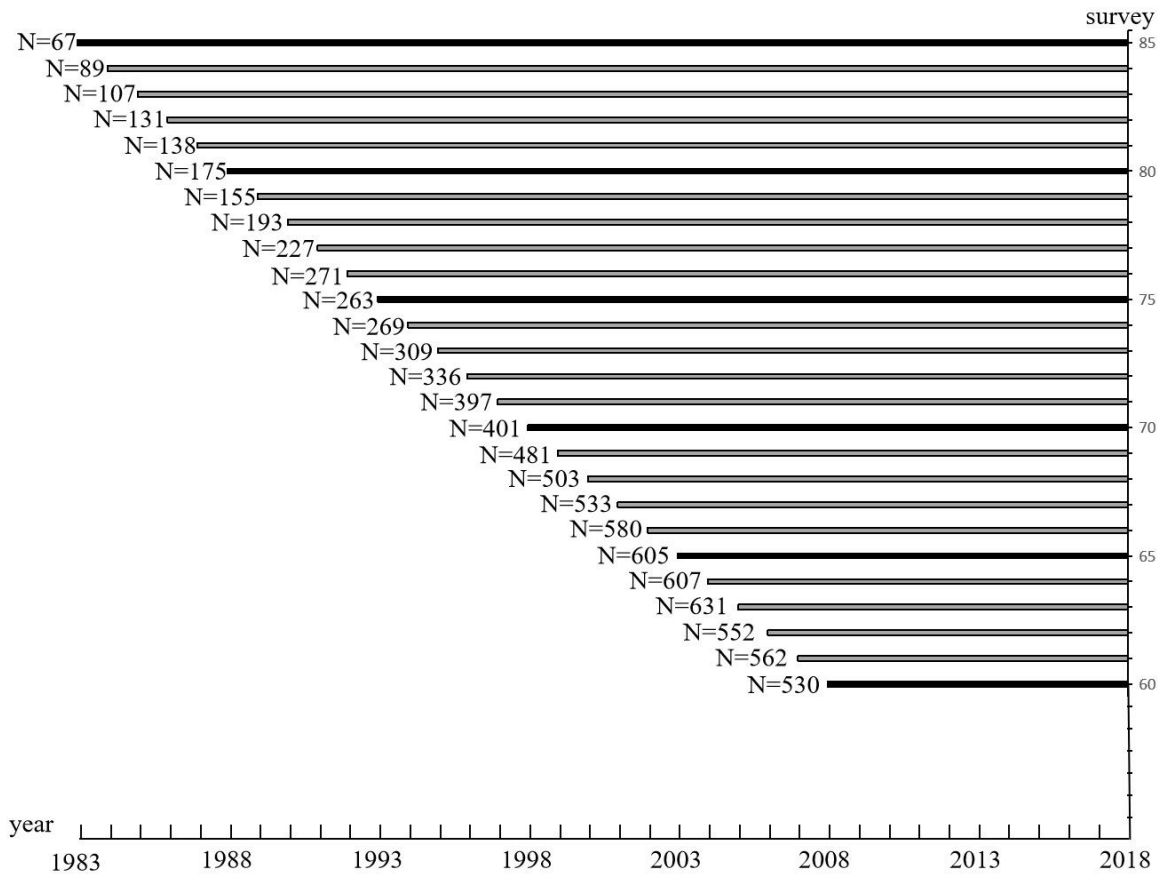

**eFigure 1 Retracing the Development of Chronic Disease in the Sample.**

N = number; The total number of respondents was 9,112.

1  
2  
3  
4  
5  
6  
7  
8  
9  
10  
11  
12  
13  
14  
15  
16  
17  
18  
19  
20  
21  
22  
23  
24  
25  
26  
27  
28  
29  
30  
31  
32  
33  
34  
35  
36  
37  
38  
39  
40  
41  
42  
43  
44  
45  
46  
47  
48  
49  
50  
51  
52  
53  
54  
55  
56  
57  
58  
59  
60

For peer review only

## Supplemental Tables

**eTable 1** Questionnaire Items and Prevalence of Each ELA Indicator

**eTable 2** Tabulated BIC and  $2\Delta\text{BIC}$  (using 12 chronic conditions)

**eTable 3** Sample Characteristics by Multimorbidity Trajectories in CHARLS 2018 (N=9,112)

**eTable 4** Multinomial Logistic Regression Models for nine types of ELA Experiences and Multimorbidity Trajectories

**eTable 5** Multinomial Logistic Regressions for ELA Experiences (Male, N=4,440)

**eTable 6** Multinomial Logistic Regressions for ELA Experiences ( Female, N=4,672)

**eTable 7** Multinomial Logistic Regressions for ELA Experiences (Urban, N=3,305)

**eTable 8** Multinomial Logistic Regressions for ELA Experiences (Rural, N=5,807)

**eTable 1 Questionnaire Items and Prevalence of Each ELA Indicator**

| Types of ELA             | Questionnaire Items                                                                                                                                                                                                                                                                                                       | Prevalence (%) |
|--------------------------|---------------------------------------------------------------------------------------------------------------------------------------------------------------------------------------------------------------------------------------------------------------------------------------------------------------------------|----------------|
| Parental Illness         | Did your female/male guardian have a long time be sick on bed when you were young? (yes <sup>a</sup> , no)                                                                                                                                                                                                                | 23.5%          |
|                          | Did your female/male guardian have a serious deformity when you were young? (yes <sup>a</sup> , no)                                                                                                                                                                                                                       |                |
|                          | Did your female/male guardian have abnormality of mind when you were young? (yes <sup>a</sup> , no)                                                                                                                                                                                                                       |                |
| Parental Death           | Is your biological mother/biological father alive? (yes <sup>a</sup> , no)                                                                                                                                                                                                                                                | 23.0%          |
| Parental Quarrel/Divorce | Did your parents often quarrel? (often <sup>a</sup> , sometimes <sup>a</sup> , not very often <sup>a</sup> , never)                                                                                                                                                                                                       | 19.3%          |
|                          | Were your biological parents divorced? (yes <sup>a</sup> , no)                                                                                                                                                                                                                                                            |                |
| Relative Poverty         | When you were a child before age 17, compared to the average family in the same community/village at that time, how was your family's financial situation? (a lot better off than them, somewhat better off than them, same as them, somewhat worse off than them <sup>a</sup> , a lot worse off than them <sup>a</sup> ) | 41.1%          |
| Food Insufficiency       | When you were a child before age 17 was there ever a time when your family did not have enough food to eat? (yes <sup>a</sup> , no)                                                                                                                                                                                       | 77.9%          |
| Domestic Violence        | When you were growing up, did your female/male guardian ever hit you? Was that often, sometimes, rarely, or never? (often <sup>a</sup> , sometimes <sup>a</sup> , rarely <sup>a</sup> , never)                                                                                                                            | 56.9%          |
|                          | When you were a child, how often were you picked on or bullied by kids in your neighborhood? Is it often, sometimes, rarely or never? (often <sup>a</sup> , sometimes <sup>a</sup> , not very often <sup>a</sup> , never)                                                                                                 |                |
| Bullying                 | When you were a child, how often were you picked on or bullied by kids in your school? Is it often, sometimes, rarely or never? (often <sup>a</sup> , sometimes <sup>a</sup> , not very often <sup>a</sup> , never)                                                                                                       | 26.5%          |
| Poor Physical Health     | Before you were 15 years old (including 15 years old), would you say that compared to other children of the same age, you were (much healthier, somewhat healthier, about average, somewhat less healthy <sup>a</sup> , much less healthy <sup>a</sup> )                                                                  | 13.1%          |
|                          | When you were a child, how often did you feel lonely for not having friends? Is it often, sometimes, not very often or never? (often <sup>a</sup> , sometimes <sup>a</sup> , not very often <sup>a</sup> , never)                                                                                                         |                |
| Loneliness               |                                                                                                                                                                                                                                                                                                                           | 13.4%          |

Notes: ELA = early life adversity. <sup>a</sup> Answers indicate thresholds for ELA. Prevalence indicates the proportion of individuals who have experienced ELA. "Poor

Physical Health” and “Loneliness” are two additional indicators of ELA added for sensitivity analysis.

**eTable 2 Tabulated BIC and 2ΔBIC (using 12 chronic conditions)**

| Number of Groups | BIC        | Entropy | 2(ΔBIC)   |
|------------------|------------|---------|-----------|
| 1                | -302678.31 | .       | .         |
| 2                | -245853.85 | 0.972   | -56824.46 |
| 3                | -219850.02 | 0.976   | -26003.83 |
| 4                | -206847.93 | 0.980   | -13002.09 |
| 5                | -194196.80 | 0.979   | -12651.13 |
| 6                | -186460.39 | 0.945   | -7736.41  |

*Notes:* The GBTM analyses using 12 chronic conditions (excluding memory-related and emotional/psychiatric problems given their low prevalence in the study population). N=9,112. BIC = Bayesian Information Criterion. The closer the entropy is to 1, the better the model fits.

**eTable 3 Sample Characteristics by Multimorbidity Trajectories  
in CHARLS 2018 (N=9,112)**

| Variables (%)                     | Multimorbidity Trajectories |         |         |         | P-value |
|-----------------------------------|-----------------------------|---------|---------|---------|---------|
|                                   | Group 1                     | Group 2 | Group 3 | Group 4 |         |
| Female                            | 45.8                        | 51.0    | 51.7    | 57.1    | <0.001  |
| Rural                             | 65.1                        | 63.6    | 63.0    | 64.3    | 0.464   |
| Marital Status                    |                             |         |         |         | <0.001  |
| married                           | 72.3                        | 77.3    | 81.2    | 83.6    |         |
| other status                      | 27.7                        | 22.7    | 18.8    | 16.4    |         |
| Educational Attainment            |                             |         |         |         | 0.116   |
| below high school                 | 90.4                        | 90.9    | 89.8    | 88.5    |         |
| high school and above             | 9.6                         | 9.1     | 10.2    | 11.5    |         |
| Receiving <i>Dibao</i> Assistance | 92.0                        | 90.6    | 90.1    | 86.8    | <0.001  |
| Types of Medical Insurance        |                             |         |         |         | 0.656   |
| none                              | 3.3                         | 3.2     | 2.8     | 2.3     |         |
| urban employee                    | 12.2                        | 12.5    | 13.2    | 14.1    |         |
| urban and rural resident          | 82.0                        | 82.0    | 81.7    | 81.2    |         |
| others                            | 2.6                         | 2.3     | 2.3     | 2.4     |         |
| Smoking                           | 52.2                        | 55.3    | 55.6    | 56.9    | 0.038   |
| Drinking                          | 63.2                        | 65.3    | 65.2    | 69.3    | 0.004   |
| Physical Activity                 |                             |         |         |         | 0.020   |
| none                              | 13.6                        | 12.6    | 12.1    | 13.7    |         |
| low intensity                     | 35.7                        | 33.0    | 31.9    | 32.8    |         |
| moderate intensity                | 23.8                        | 27.6    | 28.7    | 26.9    |         |
| high intensity                    | 26.9                        | 26.7    | 27.4    | 26.6    |         |

*Notes:* ELA = early life adversity. The information is from the China Health and Retirement Longitudinal Study 2018. Other status of marriage includes unmarried/divorced/ separated/widowed. Urban and rural resident medical insurance integrated urban resident medical insurance and new rural cooperative medical insurance. The results of the chi-square test for variables.

**eTable 4 Multinomial Logistic Regression Models for nine types of ELA Experiences and Multimorbidity Trajectories**

| Variables                | Group 2                      | Group 3                            | Group 4                 |
|--------------------------|------------------------------|------------------------------------|-------------------------|
|                          | Low onset-rapidly increasing | Middle onset-moderately increasing | Chronically-high        |
|                          | RRR (95% CI)                 | RRR (95% CI)                       | RRR (95% CI)            |
| <b>Model 1</b>           |                              |                                    |                         |
| Parental Illness         | 1.050 (0.883-1.250)          | 1.220 (1.044-1.425)*               | 1.816 (1.517-2.173)***  |
| Parental Death           | 1.015 (0.860-1.197)          | 0.994 (0.856-1.154)                | 0.935 (0.777-1.125)     |
| Parental Quarrel/Divorce | 1.206 (1.003-1.449)*         | 1.166 (0.986-1.377)                | 1.230 (1.010-1.499)*    |
| Relative Poverty         | 1.069 (0.922-1.238)          | 1.176 (1.030-1.344)*               | 1.229 (1.045-1.446)*    |
| Food Insufficiency       | 1.413 (1.204-1.659)***       | 1.366 (1.183-1.576)***             | 1.768 (1.461-2.141)***  |
| Domestic Violence        | 1.128 (0.978-1.302)          | 1.343 (1.180-1.528)***             | 1.586 (1.349-1.865)***  |
| Bullying                 | 1.046 (0.882-1.239)          | 1.188 (1.021-1.383)*               | 1.377 (1.149-1.650)**   |
| Poor Physical Health     | 1.333 (1.050-1.692)*         | 1.613 (1.302-1.998)***             | 2.317 (1.827-2.939)***  |
| Loneliness               | 0.973 (0.785-1.207)          | 1.028 (0.848-1.246)                | 1.160 (0.924-1.458)     |
| <b>Model 2</b>           |                              |                                    |                         |
| ELA (ref: none)          |                              |                                    |                         |
| 1-2                      | 1.668 (1.248-2.229)**        | 1.483 (1.151-1.910)**              | 2.119 (1.430-3.138)***  |
| 3-4                      | 2.088 (1.556-2.803)***       | 2.205 (1.706-2.851)***             | 4.088 (2.760-6.054)***  |
| 5-9                      | 2.278 (1.632-3.180)***       | 3.016 (2.254-4.035)***             | 7.862 (5.173-11.947)*** |

Notes: Reference category was Group 1 ("maintaining-low"). RRR = relative risk ratios. CI = confidence interval. ELA = early life adversity. ref = reference. \*p < .05; \*\*p < .01; \*\*\*p < .001. Model adjusted for gender, residence area, marital status, educational attainment, types of medical insurance, and whether receive *Dibao* assistance, smoking, drinking, and physical activity.



**eTable 5 Multinomial Logistic Regressions for ELA Experiences (Male, N=4,440)**

| Variables                | Group 2                      | Group 3                            | Group 4                 |
|--------------------------|------------------------------|------------------------------------|-------------------------|
|                          | Low onset-rapidly increasing | Middle onset-moderately increasing | Chronically-high        |
|                          | RRR (95% CI)                 | RRR (95% CI)                       | RRR (95% CI)            |
| <b>Model 1</b>           |                              |                                    |                         |
| Parental Illness         | 0.884 (0.693-1.128)          | 1.140 (0.923-1.407)                | 1.756 (1.363-2.261)***  |
| Parental Death           | 1.028 (0.820-1.288)          | 1.052 (0.860-1.286)                | 1.045 (0.808-1.351)     |
| Parental Quarrel/Divorce | 1.111 (0.862-1.433)          | 1.172 (0.935-1.469)                | 1.134 (0.855-1.505)     |
| Relative Poverty         | 1.053 (0.861-1.288)          | 1.216 (1.016-1.454)*               | 1.343 (1.069-1.687)*    |
| Food Insufficiency       | 1.444 (1.151-1.812)**        | 1.548 (1.263-1.897)***             | 1.873 (1.404-2.499)***  |
| Domestic Violence        | 1.056 (0.864-1.290)          | 1.196 (0.998-1.434)                | 1.440 (1.130-1.835)**   |
| Bullying                 | 0.957 (0.769-1.190)          | 1.124 (0.928-1.362)                | 1.324 (1.042-1.683)*    |
| <b>Model 2</b>           |                              |                                    |                         |
| ELA (ref: none)          |                              |                                    |                         |
| 1-2                      | 2.145 (1.365-3.370)**        | 1.621 (1.108-2.372)*               | 1.919 (1.072-3.435)*    |
| 3-4                      | 2.241 (1.425-3.524)***       | 2.249 (1.539-3.287)***             | 3.018 (1.695-5.374)***  |
| 5-7                      | 2.284 (1.341-3.891)**        | 3.214 (2.058-5.020)***             | 6.224 (3.316-11.683)*** |

Notes: Reference category was Group 1 (“maintaining-low”). RRR = relative risk ratios. CI = confidence interval. ELA = early life adversity. ref =reference. \*p < .05; \*\*p < .01; \*\*\*p < .001. Model adjusted for residence area, marital status, educational attainment, types of medical insurance, and whether receive *Dibao* assistance, smoking, drinking, and physical activity.

**eTable 6 Multinomial Logistic Regressions for ELA Experiences ( Female, N=4,672)**

| Variables                | Group 2                      | Group 3                            | Group 4                 |
|--------------------------|------------------------------|------------------------------------|-------------------------|
|                          | Low onset-rapidly increasing | Middle onset-moderately increasing | Chronically-high        |
|                          | RRR (95% CI)                 | RRR (95% CI)                       | RRR (95% CI)            |
| <b>Model 1</b>           |                              |                                    |                         |
| Parental Illness         | 1.273 (0.993-1.633)          | 1.351 (1.076-1.696)*               | 2.061 (1.599-2.656)***  |
| Parental Death           | 1.030 (0.810-1.308)          | 0.965 (0.775-1.201)                | 0.905 (0.697-1.176)     |
| Parental Quarrel/Divorce | 1.321 (1.012-1.724)*         | 1.194 (0.934-1.527)                | 1.374 (1.041-1.815)*    |
| Relative Poverty         | 1.128 (0.912-1.395)          | 1.217 (1.003-1.477)*               | 1.332 (1.061-1.670)*    |
| Food Insufficiency       | 1.350 (1.078-1.690)**        | 1.234 (1.009-1.509)*               | 1.699 (1.315-2.195)***  |
| Domestic Violence        | 1.219 (0.993-1.497)          | 1.521 (1.263-1.831)***             | 1.777 (1.426-2.215)***  |
| Bullying                 | 1.254 (0.959-1.640)          | 1.401 (1.098-1.789)**              | 1.692 (1.286-2.227)***  |
| <b>Model 2</b>           |                              |                                    |                         |
| ELA (ref: none)          |                              |                                    |                         |
| 1-2                      | 1.412 (0.991-2.013)          | 1.445 (1.057-1.975)*               | 1.949 (1.241-3.060)**   |
| 3-4                      | 2.013 (1.390-2.916)***       | 2.147 (1.546-2.983)***             | 4.408 (2.784-6.979)***  |
| 5-7                      | 3.588 (2.120-6.074)***       | 4.212 (2.601-6.819)***             | 9.444 (5.237-17.030)*** |

Notes: Reference category was Group 1 ("maintaining-low"). RRR = relative risk ratios. CI = confidence interval. ELA = early life adversity. ref =reference.

\*p < .05; \*\*p < .01; \*\*\*p < .001. Model adjusted for residence area, marital status, educational attainment, types of medical insurance, and whether receive *Dibao* assistance, smoking, drinking, and physical activity.

**eTable 7 Multinomial Logistic Regressions for ELA Experiences (Urban , N=3,305)**

| Variables                | Group 2                      | Group 3                            | Group 4                 |
|--------------------------|------------------------------|------------------------------------|-------------------------|
|                          | Low onset-rapidly increasing | Middle onset-moderately increasing | Chronically-high        |
|                          | RRR (95% CI)                 | RRR (95% CI)                       | RRR (95% CI)            |
| <b>Model 1</b>           |                              |                                    |                         |
| Parental Illness         | 1.086 (0.794-1.484)          | 1.198 (0.905-1.585)                | 1.673 (1.210-2.313)**   |
| Parental Death           | 1.060 (0.793-1.416)          | 1.021 (0.786-1.327)                | 1.031 (0.746-1.425)     |
| Parental Quarrel/Divorce | 1.207 (0.889-1.639)          | 1.110 (0.841-1.465)                | 1.195 (0.860-1.662)     |
| Relative Poverty         | 1.111 (0.858-1.438)          | 1.324 (1.049-1.670)*               | 1.419 (1.072-1.879)*    |
| Food Insufficiency       | 1.518 (1.170-1.970)**        | 1.415 (1.123-1.784)**              | 1.837 (1.355-2.490)***  |
| Domestic Violence        | 1.166 (0.917-1.484)          | 1.385 (1.115-1.722)**              | 1.640 (1.249-2.154)***  |
| Bullying                 | 1.069 (0.800-1.429)          | 1.250 (0.965-1.619)                | 1.689 (1.246-2.291)**   |
| <b>Model 2</b>           |                              |                                    |                         |
| ELA (ref: none)          |                              |                                    |                         |
| 1-2                      | 1.709 (1.118-2.614)*         | 1.821 (1.245-2.663)**              | 2.378 (1.365-4.143)**   |
| 3-4                      | 2.113 (1.359-3.285)**        | 2.652 (1.788-3.933)***             | 4.394 (2.497-7.732)***  |
| 5-7                      | 3.195 (1.718-5.944)***       | 4.463 (2.546-7.824)***             | 9.875 (4.867-20.032)*** |

Notes: Reference category was Group 1 (“maintaining-low”). RRR = relative risk ratios. CI = confidence interval. ELA = early life adversity. ref =reference. \*p < .05; \*\*p < .01; \*\*\*p < .001. Model adjusted for gender, marital status, educational attainment, types of medical insurance, and whether receive *Dibao* assistance, smoking, drinking, and physical activity.

eTable 8 Multinomial Logistic Regressions for ELA Experiences (Rural, N=5,807)

| Variables                | Group 2                      | Group 3                            | Group 4                 |
|--------------------------|------------------------------|------------------------------------|-------------------------|
|                          | Low onset-rapidly increasing | Middle onset-moderately increasing | Chronically-high        |
|                          | RRR (95% CI)                 | RRR (95% CI)                       | RRR (95% CI)            |
| <b>Model 1</b>           |                              |                                    |                         |
| Parental Illness         | 1.049 (0.852-1.290)          | 1.244 (1.034-1.496)*               | 2.009 (1.623-2.486)***  |
| Parental Death           | 1.022 (0.837-1.246)          | 1.011 (0.845-1.209)                | 0.963 (0.772-1.202)     |
| Parental Quarrel/Divorce | 1.214 (0.965-1.526)          | 1.218 (0.990-1.498)                | 1.294 (1.013-1.653)*    |
| Relative Poverty         | 1.086 (0.910-1.296)          | 1.160 (0.989-1.360)                | 1.304 (1.072-1.584)**   |
| Food Insufficiency       | 1.337 (1.093-1.636)**        | 1.339 (1.117-1.605)**              | 1.761 (1.379-2.250)***  |
| Domestic Violence        | 1.118 (0.937-1.334)          | 1.321 (1.126-1.549)**              | 1.586 (1.298-1.936)***  |
| Bullying                 | 1.040 (0.846-1.279)          | 1.203 (1.001-1.446)*               | 1.337 (1.073-1.666)*    |
| <b>Model 2</b>           |                              |                                    |                         |
| ELA (ref: none)          |                              |                                    |                         |
| 1-2                      | 1.693 (1.173-2.442)**        | 1.325 (0.971-1.810)                | 1.762 (1.107-2.803)*    |
| 3-4                      | 2.037 (1.405-2.954)***       | 1.856 (1.354-2.545)***             | 3.429 (2.156-5.453)***  |
| 5-7                      | 2.426 (1.547-3.804)***       | 2.917 (1.983-4.291)***             | 6.606 (3.920-11.132)*** |

Notes: Reference category was Group 1 ("maintaining-low"). RRR = relative risk ratios. CI = confidence interval. ELA = early life adversity. ref =reference.

\*p < .05; \*\*p < .01; \*\*\*p < .001. Model adjusted for gender, marital status, educational attainment, types of medical insurance, and whether receive *Dibao* assistance, smoking, drinking, and physical activity.

# BMJ Open

## Exposure to early-life adversity and long-term trajectories of multimorbidity among older adults in China: analysis of longitudinal data from the China Health and Retirement Longitudinal Study

|                                 |                                                                                                                                                                                                               |
|---------------------------------|---------------------------------------------------------------------------------------------------------------------------------------------------------------------------------------------------------------|
| Journal:                        | <i>BMJ Open</i>                                                                                                                                                                                               |
| Manuscript ID                   | bmjopen-2023-075834.R1                                                                                                                                                                                        |
| Article Type:                   | Original research                                                                                                                                                                                             |
| Date Submitted by the Author:   | 10-Jan-2024                                                                                                                                                                                                   |
| Complete List of Authors:       | Liu, Huiying; Central South University, Department of Sociology<br>Zhang, Mi; Central South University,<br>Zhang, Xinyan; Central South University, Department of Sociology<br>Zhao, Xinyi; Peking University |
| <b>Primary Subject Heading</b>: | Geriatric medicine                                                                                                                                                                                            |
| Secondary Subject Heading:      | Sociology                                                                                                                                                                                                     |
| Keywords:                       | Ageing, Chronic Disease, Adverse events < THERAPEUTICS                                                                                                                                                        |
|                                 |                                                                                                                                                                                                               |

SCHOLARONE™  
Manuscripts



I, the Submitting Author has the right to grant and does grant on behalf of all authors of the Work (as defined in the below author licence), an exclusive licence and/or a non-exclusive licence for contributions from authors who are: i) UK Crown employees; ii) where BMJ has agreed a CC-BY licence shall apply, and/or iii) in accordance with the terms applicable for US Federal Government officers or employees acting as part of their official duties; on a worldwide, perpetual, irrevocable, royalty-free basis to BMJ Publishing Group Ltd ("BMJ") its licensees and where the relevant Journal is co-owned by BMJ to the co-owners of the Journal, to publish the Work in this journal and any other BMJ products and to exploit all rights, as set out in our [licence](#).

The Submitting Author accepts and understands that any supply made under these terms is made by BMJ to the Submitting Author unless you are acting as an employee on behalf of your employer or a postgraduate student of an affiliated institution which is paying any applicable article publishing charge ("APC") for Open Access articles. Where the Submitting Author wishes to make the Work available on an Open Access basis (and intends to pay the relevant APC), the terms of reuse of such Open Access shall be governed by a Creative Commons licence – details of these licences and which [Creative Commons](#) licence will apply to this Work are set out in our licence referred to above.

Other than as permitted in any relevant BMJ Author's Self Archiving Policies, I confirm this Work has not been accepted for publication elsewhere, is not being considered for publication elsewhere and does not duplicate material already published. I confirm all authors consent to publication of this Work and authorise the granting of this licence.

1  
2  
3  
4 **Exposure to early-life adversity and long-term trajectories of**  
5  
6 **multimorbidity among older adults in China: analysis of longitudinal**  
7  
8 **data from the China Health and Retirement Longitudinal Study**  
9  
10  
11  
12  
13

14 Huiying Liu PhD<sup>1</sup>, Mi Zhang BA<sup>1</sup>, Xinyan Zhang BA<sup>1</sup>, Xinyi Zhao, PhD\*<sup>2</sup>  
15  
16  
17

- 18  
19 1. Department of Sociology, Central South University, Changsha, China  
20  
21  
22 2. School of Health Humanities, Peking University, Beijing, China  
23  
24  
25

26 Correspondence to:  
27

28 Xinyi Zhao, PhD  
29

30 School of Health Humanities, Peking University, No. 38 Xueyuan Road, Beijing  
31  
32

33 100191, China  
34  
35

36 E-mail: zhaoxinyi@hsc.pku.edu.cn  
37  
38  
39  
40  
41

42 **Keywords: Aging; Chronic Disease; Adverse events < THERAPEUTICS**  
43

44 **Word count: 5929**  
45  
46  
47  
48  
49  
50  
51  
52  
53  
54  
55  
56  
57  
58  
59  
60

## ABSTRACT

**Objectives:** This study aimed to identify long-term distinct trajectories of multimorbidity with ageing from 50 to 85 years among Chinese older adults and examine the relationship between exposure to early-life adversity (ELA; including specific types of adversity and accumulation of different adversities) with these long-term multimorbidity trajectories.

**Design:** Group-based trajectory models identified long-term multimorbidity trajectories. Multinomial logistic regression models were used to examine the relationship between ELA and the identified multimorbidity trajectories.

**Setting:** This study used data from the China Health and Retirement Longitudinal Study (CHARLS, 2011–2018) and the 2014 Life History Survey.

**Participants:** We used data from 9,112 respondents (aged 60 and above) of the 2018 wave of CHARLS.

**Outcome measures:** Each respondent's history of chronic conditions and experiences of ELA were collected from the 2011-2018 waves of CHARLS and the 2014 Life History Survey.

**Results:** Four heterogeneous long-term trajectories of multimorbidity development were identified: “maintaining-low” (19.1%), “low onset-rapidly increasing” (23.3%), “middle onset-moderately increasing” (41.5%), and “chronically-high” (16.2%). Our findings indicated that the heterogeneity can be explained by ELA experiences. Across various types of different ELA experiences, exposure to food insufficiency (relative risk ratios: 1.372 [95% CI 1.190-1.582] to 1.780 [1.472-2.152]) and parental



1  
2  
3  
4 quarrel/divorce (1.181 [1.000-1.394] to 1.262 [1.038-1.536]) had the most prominent  
5  
6 associations with health deterioration. The accumulation of more different ELA  
7  
8 experiences was associated with a higher relative risk of developing more severe  
9  
10 multimorbidity trajectories (relative risk ratio for 5-7 ELAs and chronically-high  
11  
12 trajectory: 7.555 [95% CI 4.993-11.431]).  
13  
14  
15

16  
17 **Conclusions:** There are heterogeneous long-term trajectories of multimorbidity in  
18  
19 Chinese older adults and the risk of multimorbidity associated with ELA accumulates  
20  
21 over the lifespan. Our findings highlight the role of a supportive early-life family  
22  
23 environment in promoting health development across the lifespan, advocating for the  
24  
25 integration of life-course approaches to implementing health disparity interventions.  
26  
27  
28  
29  
30  
31

32  
33 **Keywords:** chronic disease development; childhood adversity; Chinese older adults;  
34  
35 longitudinal trajectory  
36  
37  
38  
39  
40

#### 41 **Strengths and limitations of this study**

- 42 ● Taking advantage of time-varying data on the history of chronic conditions, we  
43  
44 captured the entire course of individuals' development of multimorbidity from the  
45  
46 first chronic disease onset to old age, with the longest time spanning 35 years.  
47  
48
- 49 ● Our study investigated the longitudinal association between ELA and long-term  
50  
51 differential multimorbidity trajectories.  
52  
53
- 54 ● Our study linked two important aspects of early-life adversity (ELA) experiences  
55  
56 (specific types and accumulation of ELA) with multimorbidity trajectories,  
57  
58  
59  
60

1  
2  
3  
4 offering a more nuanced picture for testing the life-course models concerning the  
5  
6 pathways through which ELA might influence health development.  
7  
8

- 9 ● Our measures of ELA and multimorbidity were retrospective and based on self-  
10 reports, which may introduce recall bias into the data.  
11  
12
- 13 ● We did not consider the frequency and intensity of ELA, which was limited by data  
14 unavailability; additionally, there may be other protective factors (e.g., resilience)  
15 related to multimorbidity that could not be included in our study.  
16  
17  
18  
19  
20  
21  
22  
23  
24  
25  
26  
27  
28  
29  
30  
31  
32  
33  
34  
35  
36  
37  
38  
39  
40  
41  
42  
43  
44  
45  
46  
47  
48  
49  
50  
51  
52  
53  
54  
55  
56  
57  
58  
59  
60

## INTRODUCTION

Chronic diseases are one of the leading causes of death, placing a huge burden on healthcare systems worldwide [1]. Multimorbidity, defined as the coexistence of two or more chronic conditions, has been observed at an extremely high prevalence in old age[2]. More than half of Chinese older adults are estimated to have two or more chronic conditions [3], and this number is expected to increase with the continuing population aging and improvements in the survival of people with chronic diseases. Extensive studies have documented a range of adverse outcomes resulting from multimorbidity, including a higher risk of mortality, disability, and increased healthcare use [4].

Despite the growing interest in studying multimorbidity and its associated factors, previous research has mostly focused on a list of arbitrarily chosen conditions at a single point or period in time and thus does not cover the complete time-varying picture of multimorbidity [5][6]. Recent research has indicated that older individuals not only show variations in the timing of disease onset but also develop multimorbidity at different rates over time [7][8]. In particular, several studies have successfully identified distinct subgroups of multimorbidity within study populations [9][10][11]. Similar groups emerged across these studies, including a group of older individuals maintaining few conditions, a group characterized by a consistently high number of conditions, and a group of individuals reporting a rapidly increasing number of conditions [12][13]. To our knowledge, however, no study has examined heterogeneous

1  
2  
3  
4 multimorbidity trajectories by longitudinally capturing the accumulation of chronic  
5  
6 conditions throughout the whole period starting from an individual's first-onset  
7  
8 condition to his or her very old age. Identifying such long-term trajectories will not only  
9  
10 enhance the understanding of the development of multimorbidity but also help  
11  
12 prognostic studies better target people at risk of more severe multimorbidity  
13  
14 progression and associated adverse outcomes.  
15  
16  
17  
18  
19  
20  
21

22 Early-life adversity (ELA) has been documented as a potential risk factor for worse  
23  
24 health outcomes, including an increased risk of multimorbidity in old age [14][15][16].  
25  
26 ELA is commonly defined as exposure to traumatic events such as parental death,  
27  
28 parental divorce, or abuse during childhood [17][18]. The life-course perspective  
29  
30 provides two important theoretical models explaining the mechanisms underlying the  
31  
32 association between ELA and health development [19]. The critical period model  
33  
34 asserts that exposure to ELA has long-lasting influence on individuals' developmental  
35  
36 trajectories of health. This influence could vary across different types of ELA  
37  
38 experiences, and operate by shaping the structural aspects of individuals' brain  
39  
40 architecture and behavioral development [20][21]. Existing studies supporting this  
41  
42 model have demonstrated that exposure to specific types of ELA (e.g., domestic  
43  
44 violence and food deprivation) could increase the risk of multimorbidity in various  
45  
46 older populations through the dysregulation of centrally mediated stress-response  
47  
48 processes [22][23] and the promotion of detrimental behaviors or poor social ties  
49  
50 [24][25]. Alternatively, the accumulation of risk model suggests that early-life  
51  
52  
53  
54  
55  
56  
57  
58  
59  
60

1  
2  
3  
4 disadvantages increase one's exposure to later health risks, contributing to the  
5  
6 development of the adulthood health "chain of risk", wherein ELA experiences at  
7  
8 different life stages tend to sequentially compound [19][20]. Empirical evidence  
9  
10 supporting this model has revealed that individuals who experienced four or more  
11  
12 accumulated ELA reported increased risks of multimorbidity and developing specific  
13  
14 chronic conditions (e.g., dyslipidemia and psychiatric disease) compared with those  
15  
16 who did not experience ELA [26].  
17  
18  
19  
20  
21  
22  
23  
24

25 In addition to the life-course perspective, the cumulative disadvantage (CDA)  
26  
27 framework also provides important viewpoints for understanding the impact of ELA on  
28  
29 later-life health disparities highlighting the mechanism of path dependence. It posits  
30  
31 that initial disparities can be linked to later-life health outcomes indirectly through  
32  
33 influencing adulthood exposure to environmental risks and health opportunities [27].  
34  
35 Empirical studies have revealed that disadvantaged early environment (e.g., lower  
36  
37 educational attainment) may lead to poorer socioeconomic status in adulthood (e.g.,  
38  
39 placement in the occupational hierarchy), subsequently exerting significant effects on  
40  
41 later-life health through the influence of lifestyle choices or access to medical services  
42  
43 [28].  
44  
45  
46  
47  
48  
49  
50  
51  
52

53 To our knowledge, no existing studies have incorporated the life-course theory and the  
54  
55 CDA framework for understanding the impact of ELA experiences on health  
56  
57 development in later life, particularly by linking the two aspects of ELA experiences  
58  
59  
60

1  
2  
3  
4 (types and accumulation) with long-term distinct trajectories of multimorbidity. Using  
5  
6 population-based longitudinal data, the present study aimed to identify long-term  
7  
8 heterogeneous trajectories of multimorbidity among Chinese older adults starting in  
9  
10 late adulthood and followed up to 35 years and to examine the relationship between  
11  
12 exposure to ELA (including specific types of adversity and accumulation of different  
13  
14 adversities) and these long-term multimorbidity trajectories. Drawing from the existing  
15  
16 literature, we expected that exposure to certain types of ELA and the accumulation of  
17  
18 more different ELA types would be associated with a higher likelihood of more severe  
19  
20 multimorbidity trajectories. Clarifying the impact of ELA experiences on later-life  
21  
22 health will provide a basis for health care providers to develop comprehensive lifecycle  
23  
24 health interventions.  
25  
26  
27  
28  
29  
30  
31  
32  
33  
34

## 35 **METHODS**

### 36 **Data and sampling**

37  
38 The present study utilized data from the four waves (2011-2018) of the China Health  
39  
40 and Retirement Longitudinal Study (CHARLS) and the 2014 Life History Survey. The  
41  
42 2011 baseline survey collected data from 17,706 respondents aged 45 and above on  
43  
44 their demographic, socioeconomic and health characteristics. The 2014 Life History  
45  
46 Survey interviewed respondents who participated in the 2011 and 2013 surveys and  
47  
48 collected information on their early-life experiences, including living environment,  
49  
50 family socioeconomic status, and health history. For the purpose of the present study,  
51  
52 we restricted our analytical sample to respondents who met the following inclusion  
53  
54  
55  
56  
57  
58  
59  
60

1  
2  
3  
4 criteria: (1) participated in the 2018 wave and the 2014 Life History survey; (2) birth-  
5  
6 year information was available from any of the 2011-2018 waves; (3) provided valid  
7  
8 data on the measurement of ELA and history of chronic conditions; and (4) aged  $\geq 60$   
9  
10 years in 2018. In addition, we excluded respondents aged over 85 in 2018 because the  
11  
12 oldest-old group was not well represented in the CHARLS (the proportion of  
13  
14 respondents aged over 85 in the 2018 CHARLS survey was 1.6%). The final analytical  
15  
16 sample included 9,112 respondents (see *Figure 1* for details about the sample selection  
17  
18 process). To validate that the sample size in this study enabled subgrouping analyses, a  
19  
20 power analysis using Stata 17 determined that, given an  $\alpha$  level of 0.05 and a power of  
21  
22 0.8, the sample size required to achieve the detection of significant relationships  
23  
24 between study variables would be approximately 863 respondents.  
25  
26  
27  
28  
29  
30  
31  
32  
33  
34

## 35 **Variables**

### 36 *Development of chronic conditions*

37  
38 We obtained information about each respondent's history of chronic conditions from  
39  
40 the 2011-2018 CHARLS survey. In each survey, respondents were asked if they had  
41  
42 been diagnosed by a healthcare provider with any of the following 14 chronic  
43  
44 conditions: hypertension, dyslipidemia, diabetes, cancer or malignant tumor, chronic  
45  
46 lung diseases, liver disease, heart disease, stroke, kidney disease, stomach or other  
47  
48 digestive diseases, arthritis or rheumatism, asthma, emotional or psychiatric problems,  
49  
50 and memory-related disorders [29]. For each condition, respondents who answered in  
51  
52 the affirmative were then asked to report the year when this condition was first  
53  
54  
55  
56  
57  
58  
59  
60

1  
2  
3  
4 diagnosed. Using the self-reported information on the starting year of each condition,  
5  
6 we calculated the age at onset of each chronic condition for each respondent. Given that  
7  
8 most studies on chronic conditions used age 50 as a starting point and the high  
9  
10 prevalence of chronic conditions in people over 50, we tracked each individual's  
11  
12 chronic conditions from the age of 50 [30][31]. Then, the time-varying variable  
13  
14 "development of chronic conditions" was generated for each respondent, indicating his  
15  
16 or her total number of chronic conditions being diagnosed in each year between the age  
17  
18 of 50 and the current age when participating in the 2018 CHARLS survey. For more  
19  
20 details about the distribution of this time-varying variable, please see **Supplemental**  
21  
22 **Figure 1**. This variable was further used for the identification of distinctive long-term  
23  
24 multimorbidity trajectories within this population.  
25  
26  
27  
28  
29  
30  
31  
32  
33  
34

### 35 *Early-life adversity*

36  
37 We extracted eight indicators of ELA from the CHARLS 2014 survey, including  
38  
39 parental illness, parental death, parental quarrel/divorce, relative poverty, food  
40  
41 insufficiency, domestic violence, and bullying. The detailed questionnaire items and  
42  
43 definitions of each ELA indicator are available in **Supplemental Table 1**. Responses  
44  
45 to each item were dichotomized and summed to generate a cumulative ELA score for  
46  
47 each respondent, ranging from 0 to 7. Higher scores indicated more experience with  
48  
49 ELA. To investigate the relationship between the accumulation of different ELA  
50  
51 experiences and the long-term trajectories of multimorbidity, we further categorized the  
52  
53 accumulation of ELA experiences according to ELA scores: none, 1-2, 3-4, and 5-7  
54  
55  
56  
57  
58  
59  
60



1  
2  
3  
4 types of ELA experience accumulation. The measurement has been accepted and  
5  
6 widely used in empirical studies [32].  
7  
8  
9

### 10 11 ***Covariates***

12  
13  
14 We controlled for a number of confounding factors identified in previous studies that  
15  
16 may contribute to the association between ELA and multimorbidity [10] [33] [34].  
17  
18

19 These factors include (1) demographic characteristics: gender, residence area (urban  
20  
21 versus rural), and marital status (married versus other status including  
22  
23 unmarried/divorced/separated/widowed); (2) socioeconomic characteristics:  
24  
25 educational attainment (below high school versus high school and above), whether  
26  
27 receiving Dibao assistance, and types of medical insurance (none, urban employee,  
28  
29 urban and rural resident, and others); and (3) health behavior factors: smoking, drinking,  
30  
31 and physical activity (no-, light-, moderate- and vigorous-intensity physical activity).  
32  
33  
34  
35  
36  
37  
38  
39

### 40 41 **Analytical strategy**

42  
43 The group-based trajectory modeling (GBTM) approach was used to model progression  
44  
45 in the number of chronic conditions over time (i.e., from late adulthood to old age)  
46  
47 [35][36][37]. The GBTM approach is designed to identify distinctive groups of  
48  
49 individuals sharing a similar trajectory using finite mixtures of suitably defined  
50  
51 probability distributions [35]. Applied to this study, this approach enables the  
52  
53 assignment of individuals into distinct trajectories based on the similarity of  
54  
55 multimorbidity trajectories as they age. In specific, each individual was assigned to a  
56  
57  
58  
59  
60

1  
2  
3  
4 single group in which they have the highest posterior probability of membership [6].  
5

6 The fundamental concept of interest is the distribution of outcomes (in our study, the  
7 number of chronic conditions) conditional on age. We examined a series of  
8  
9 foundational assumptions of GBTM [38][39]. First, GBTM assumes that the data  
10  
11 follow continuous distribution with finite starting and ending points (in this study, the  
12  
13 chronic conditions data are continuous, ranging from 0 to 14). Given the slight  
14  
15 skewness in the data, we examined the applicability of the censored normal (cnorm)  
16  
17 model and the zero-inflated Poisson(zip) model. The results indicated a better fit for the  
18  
19 cnorm model. Second, GBTM assumes that heterogeneity between groups arises from  
20  
21 differences in trajectory development rather than other variables. We compared the  
22  
23 model with random effects, including gender, to the model without random effects, and  
24  
25 the results did not show significant differences. Third, GBTM posits that all trajectories  
26  
27 exhibit steady changes (in this study, the number of chronic conditions in individuals  
28  
29 increased over time). Fourth, GBTM assumes that the sample size of each subgroup  
30  
31 should not be less than 5% of the total sample size. In this study, the smallest subgroup  
32  
33 constituted 16.2% of the total sample (the sample sizes of the four groups were 1743,  
34  
35 2119, 3779, and 1471, respectively), exceeding the model requirements significantly.  
36  
37  
38  
39  
40  
41  
42  
43  
44  
45  
46  
47  
48  
49

50 Following the standard procedure for applying this approach, we conducted a sequence  
51  
52 of GBTM models. A small amount of missingness occurred due to no-response or  
53  
54 incomplete responses to the chronic conditions and ELA information; these missing  
55  
56 data were treated as missing at random. For model selection, we used the following  
57  
58  
59  
60

1  
2  
3  
4 model-fit indices and statistical criteria in combination with conceptual considerations  
5  
6 of group distinctiveness and interpretability: (a) the Bayesian Information Criteria  
7  
8 (BIC) values. The BIC is the most widely used criteria for model selection, with a BIC  
9  
10 closer to 0 indicating better model fit. (b) relative entropy estimates the accuracy  
11  
12 (convergence) of classification of individuals into the different latent classes. Entropy  
13  
14 values close to 1 indicate lower classification uncertainty. (c) the average posterior  
15  
16 probability of group assignment that measures the probability of a group individual  
17  
18 belonging to this specific trajectory group was set at greater than 0.7; and (d) according  
19  
20 to the posterior probability of the group member, a minimum membership of 5% is  
21  
22 required in each trajectory group[40]. These criteria were applied iteratively, and the  
23  
24 final model was chosen based on a comprehensive evaluation of statistical fit and  
25  
26 conceptual coherence, striking a balance between model complexity and  
27  
28 interpretability. After identifying the optimal number of trajectory groups, univariate  
29  
30 analysis was used to test the differences in trajectory groups from the final model  
31  
32 among a range of individual characteristics at baseline. Multivariate logistic models  
33  
34 were used to assess the association between ELA and trajectory group memberships  
35  
36 after controlling for various confounding factors including demographic features,  
37  
38 socioeconomic factors, and health behavior factors.  
39  
40  
41  
42  
43  
44  
45  
46  
47  
48  
49  
50

51  
52  
53 We performed a series of sensitivity analyses: (1) We reran the GBTM analyses using  
54  
55 12 chronic conditions (excluding memory-related and emotional/psychiatric problems  
56  
57 given their low prevalence in the study population). (2) We also reran the main analyses  
58  
59  
60

1  
2  
3  
4 using a different set of ELA indicators (including two additional indicators that have  
5  
6 been suggested as having a potential influence on health in later life) and using different  
7  
8 categorizations for the accumulation of ELA. (3) All the analyses were stratified by  
9  
10 gender and urban-rural residence.  
11  
12  
13  
14  
15  
16

17 We followed the STROBE checklist for reporting observational studies (see  
18  
19 **Supplemental Table 2**).  
20  
21  
22  
23  
24

#### 25 **Patient and public involvement**

26  
27 None.  
28  
29  
30  
31

## 32 **RESULTS**

### 33 **Sample characteristics by ELA number in older adults**

34  
35 *Table 1* shows the characteristics of individuals (measured in the 2018 CHARLS survey)  
36  
37 by the accumulation of ELA experiences (none, 1 to 2 types, 3 to 4 types, and 5 to 7  
38  
39 types). Among individuals with three or more chronic conditions, the proportion of  
40  
41 individuals who reported 5 to 7 types of ELA accumulation (57.2%) was significantly  
42  
43 higher than that of those who reported less types of ELA accumulation (none, 1 to 2,  
44  
45 and 3 to 4 types). Individuals from the four accumulation groups of ELA experiences  
46  
47 significantly differ in their demographic, socioeconomic characteristics and health  
48  
49 behaviors.  
50  
51  
52  
53  
54  
55  
56  
57  
58  
59  
60

### Long-term trajectories of multimorbidity among older adults

We used the GBTM approach to identify distinct groups of individuals sharing a similar long-term trajectory of multimorbidity from age 50 to 85. Models were estimated with one to six groups (*Table 2*). Comparatively, the BIC and entropy indicated that Group 4 and Group 6 were more suitable than the other groups. The optimal BIC was found in Group 6 (closest to 0), and Group 4 exhibited the highest entropy (closest to 1, at 0.976). Meanwhile, we observed a diminished rate of BIC reduction after Group 4, suggesting that further increasing model complexity no longer yields significant benefits [40]. Based on considerations of changes in BIC and entropy, a logit model with four trajectory groups was the most suitable fit for the data.

*Figure 2* illustrates the distribution of older individuals from the four identified long-term trajectories of multimorbidity. The number of chronic conditions in Group 1 (“maintaining-low”) was consistently low, with most remaining free of chronic conditions until age 75. Older individuals in Group 2 (“low onset-rapidly increasing”) had no chronic condition at the starting point, but their number of chronic conditions showed a rapid increase after age 65. Older individuals in Group 3 (“middle onset-moderately increasing”) had one chronic condition at the starting point, and their number of chronic conditions increased steadily with age. Older adults in Group 4 (“chronically-high”) had two chronic conditions at the starting point, with the number of chronic conditions increasing rapidly with age. Please see the **Supplemental Table 3** for more information on the characteristics of the long-term trajectory distribution of

1  
2  
3  
4 multimorbidity.  
5  
6  
7  
8

### 9 **ELA predicts long-term trajectories of multimorbidity**

10  
11 Model 1 in *Table 3* presents the results of the multinomial logistic regressions for the  
12 relationship between specific types of ELA and multimorbidity trajectories. Exposure  
13 to parental illness, parental quarrel/divorce, relative poverty, food insufficiency,  
14 domestic violence, and bullying were associated with more severe long-term  
15 trajectories of multimorbidity. Individuals who had experienced parental  
16 quarrel/divorce reported a higher relative risk of being in the “low onset-rapidly  
17 increasing” group, the “middle onset-moderately increasing” group, and the  
18 “chronically-high” group than in the “maintaining-low” group. Similar results have also  
19 been found among individuals who reported childhood food insufficiency.  
20  
21  
22  
23  
24  
25  
26  
27  
28  
29  
30  
31  
32  
33  
34  
35  
36  
37

38 Model 2 in *Table 4* presents the results of the multinomial logistic regressions for the  
39 relationship between the accumulation of different ELA experiences and  
40 multimorbidity trajectories. Individuals who had accumulated 1 to 2 types, 3 to 4 types,  
41 and 5-7 types of ELA experiences reported a higher relative risk of being in the “low  
42 onset-rapidly increasing” group, the “middle onset-moderately increasing” group, and  
43 the “chronically-high” group than in the “maintaining-low” group.  
44  
45  
46  
47  
48  
49  
50  
51  
52  
53  
54  
55

### 56 **Sensitivity analyses**

57  
58 The results remained generally consistent when restricting the GBTM analyses to only  
59  
60

1  
2  
3  
4 12 chronic conditions, when using a different set of ELA indicators or different  
5  
6 categorization for the accumulation of ELA, and when stratifying by gender and urban-  
7  
8 rural residence (see **Supplemental Table 3 and Supplemental Tables 5-9** for details).  
9  
10  
11  
12

## 13 14 **DISCUSSION**

15  
16  
17 Using population-based longitudinal data, we identified four distinct long-term  
18  
19 trajectories of multimorbidity development among Chinese older adults and linked  
20  
21 different types and accumulation of ELA experiences with these long-term  
22  
23 multimorbidity trajectories. Exposure to food insufficiency and parental  
24  
25 quarrel/divorce had the most prominent associations with health deterioration.  
26  
27  
28 Individuals who had accumulated different ELA experiences had a significantly higher  
29  
30 relative risk of developing more severe multimorbidity trajectories over time.  
31  
32  
33  
34  
35  
36  
37

38 The development of multimorbidity in older adults has been widely reported, but only  
39  
40 a few studies have examined the heterogeneity of multimorbidity trajectories in older  
41  
42 adults[41][12]. Our findings confirmed the existence of heterogeneous long-term  
43  
44 multimorbidity trajectories in Chinese older adults. The “maintaining-low” (19.1%)  
45  
46 group and the “low onset-rapidly increasing” (22%) group were both characterized by  
47  
48 a low starting point, whereas the “low onset-rapidly increasing” group reported the  
49  
50 onset of diseases around the age of 65 and a faster development of new disease  
51  
52 diagnosis since the age of 80. A similar trajectory of health development in later life  
53  
54 has been consistently reported in previous studies among older Chinese populations  
55  
56  
57  
58  
59  
60

1  
2  
3  
4 across a variety of health outcomes, including frailty and functional disability [42][43].

5  
6 This might be because that increasing life expectancy and decreasing incidence of  
7  
8  
9 infectious diseases have led to an increase in chronic disease in old age [44]. Individuals  
10  
11 from the largest group “middle onset-moderately increasing” (40.2%) were  
12  
13 characterized by an average of one condition in their 50s and a gradual progression of  
14  
15 new condition diagnosis over time. The “chronically-high” group comprised  
16  
17 individuals with the highest number of conditions throughout the age range from 50 to  
18  
19 85, accounting for approximately 20% of the study population. Such a similar group  
20  
21 has also been found in several previous studies [12][13], with an estimated proportion  
22  
23 ranging between 7.5% and 27.8%.  
24  
25  
26  
27  
28  
29  
30  
31

32 Our findings indicated that exposure to specific types of ELA was associated with more  
33  
34 severe long-term multimorbidity trajectories. Experience of childhood food  
35  
36 insufficiency and parental quarrel/divorce had the most prominent associations with  
37  
38 health deterioration. Specifically, our finding was consistent with previous studies  
39  
40 linking childhood food insufficiency with a higher risk of chronic conditions in middle  
41  
42 and old age [45][25][46]. This might be due to the fact that individuals shape physiological  
43  
44 characteristics in early life that make them be capable of maintaining homeostasis in  
45  
46 metabolism when challenged by a metabolic load [47][25]. Food insufficiency in  
47  
48 childhood may lead to malnutrition, which may impair the development of metabolic  
49  
50 capacity and increase the susceptibility to chronic diseases in the long term [47].  
51  
52  
53  
54  
55  
56  
57  
58 Additionally, our finding of the harmful effects of parental quarrel/divorce on long-  
59  
60



1  
2  
3  
4 term multimorbidity trajectories extended the literature on the importance of early-life  
5  
6 dysfunctional family relationships for physical and mental health in adulthood[48][49].  
7  
8 One possible explanation might be that parental quarrel/divorce would cause  
9  
10 psychological stress in childhood [48], which causes behavioral proclivities (such as  
11  
12 unhealthy lifestyle choices) and hormonal dysregulation (such as altered endocrine  
13  
14 patterns) over the life span [50], and thereby giving rising to increased risks of chronic  
15  
16 diseases [44]. By linking specific types of ELA experiences with the longitudinal  
17  
18 development of multimorbidity, our study provided new evidence for the critical-period  
19  
20 model that childhood adverse experiences may exert long-lasting, irreversible health-  
21  
22 damaging effects that lead to significant health disparities in old age [22][26].  
23  
24  
25  
26  
27  
28  
29  
30  
31

32 Previous studies have also documented associations between the accumulation of  
33  
34 different ELA experiences and an increased risk of multimorbidity[51] [23]. The  
35  
36 current study makes a further contribution by linking the accumulation of different ELA  
37  
38 experiences with distinctive long-term trajectories of multimorbidity. Our findings  
39  
40 supported our hypothesis that individuals who experienced more accumulated ELA  
41  
42 were more likely to develop a more severe multimorbidity trajectory over time. This  
43  
44 finding was consistent with the accumulation of risk model [52], suggesting that  
45  
46 cumulative disadvantages of ELA may contribute to the persistent widening of health  
47  
48 inequalities [31]. Initial disadvantages may cause individuals to be exposed to  
49  
50 subsequent risk factors, such as interrupted education in adolescence, employment  
51  
52 disadvantages and unhealthy lifestyles in adulthood, leading to greater disparities in  
53  
54  
55  
56  
57  
58  
59  
60

1  
2  
3  
4 health status in old age [53] [54]. On the one hand, ELA such as poverty and food  
5  
6 insufficiency may cause excessive wear and tear in the body. As people age, they are  
7  
8 at increasing risks of chronic diseases such as arthritis. On the other hand, since China's  
9  
10 reform and opening up in the late 1970s, with socioeconomic development, individuals  
11  
12 who have experienced childhood adversity may have more compensatory energy intake  
13  
14 [55], leading to hypertension, diabetes, and other cardiometabolic diseases. Notably,  
15  
16 the influence of ELA on the multimorbidity trajectories observed above remained  
17  
18 significant even after adjusting for demographic features, socioeconomic factors, and  
19  
20 health behavior factors. Consistent with the existing literature linking a range of  
21  
22 individual difference factors with later-life health development [10] [33], our result  
23  
24 revealed that factors such as gender, marital status, educational attainment, Dibao  
25  
26 assistance, smoking or not smoking, and physical activity exerted independent effect  
27  
28 on multimorbidity trajectories. In specific, being female, married, having high school  
29  
30 and above educational attainment, receiving Dibao assistance, smoking, and engaging  
31  
32 in moderate physical activity intensity were significantly associated with a higher risk  
33  
34 of developing more severe multimorbidity trajectories. Our study contributed to the  
35  
36 literature by providing new evidence that ELA served as an explanatory factor  
37  
38 influencing long-term trajectories of multimorbidity. Future research could build upon  
39  
40 our study by further examining the impact of ELA on multimorbidity trajectories in  
41  
42 interaction with various confounders (e.g., gender and marital status).  
43  
44  
45  
46  
47  
48  
49  
50  
51  
52  
53  
54

55  
56  
57  
58 Our study has some key strengths. First, taking advantage of time-varying data on the  
59  
60

1  
2  
3  
4 history of chronic conditions, we captured the entire course of individuals' development  
5  
6 of multimorbidity from the first chronic disease onset to old age, with the longest time  
7  
8 spanning 35 years. Second, our study is among the first to empirically establish the  
9  
10 longitudinal association between ELA and long-term differential multimorbidity  
11  
12 trajectories. Third, our study linked two important aspects of ELA experiences (specific  
13  
14 types and accumulation of ELA) with multimorbidity trajectories, offering a more  
15  
16 nuanced picture for testing the life-course models concerning the pathways through  
17  
18 which ELA influences health development. Nevertheless, this study also has some  
19  
20 limitations. First, our measures of ELA and multimorbidity were retrospective and  
21  
22 based on self-reports, which may introduce recall bias into the data. Second, we did not  
23  
24 consider the frequency and intensity of ELA, which was limited by data unavailability.  
25  
26 Additionally, the issue of omitted variables may persist in our study, and future research  
27  
28 was encouraged to employ more comprehensive datasets to investigate the relationship  
29  
30 between potentially influential confounders (e.g., genetic inheritance and resilience)  
31  
32 with multimorbidity trajectories. Third, our sample excluded individuals over 85 years  
33  
34 old, which may have incurred some sample selection bias. Our research findings should  
35  
36 thus be interpreted with caution regarding the possible underestimation of  
37  
38 multimorbidity prevalence and trajectories in the oldest segments of the population.  
39  
40 Considering this limitation, future research could focus on developing inclusive  
41  
42 sampling strategies to ensure a more comprehensive representation of individuals aged  
43  
44 85 and above. This approach would contribute to a more comprehensive view of  
45  
46 multimorbidity across the full age spectrum.  
47  
48  
49  
50  
51  
52  
53  
54  
55  
56  
57  
58  
59  
60

## CONCLUSION

In conclusion, our study indicated that the development of multimorbidity shows considerable heterogeneity within the older Chinese population with respect to the onset and increased rate of conditions, and such heterogeneity can be explained by ELA experiences. The findings highlight the critical role of childhood in an individual's physical and psychological development, as childhood adversity can even influence the trajectory of multimorbidity in old age. Our findings could have the following implications. First, poverty alleviation programs or rural revitalization programs should pay specific attention to poor children and endeavor to provide them with better living conditions, thereby reducing the burden of multimorbidity in later life. Second, expanding existing child health services to include child support interventions that advance nurturing care is essential for a multisectoral effort to support families and benefit children [56]. For example, services that improve the nutritional status of infant and young children, as well as social work practice that identifies and intervenes in children's unfavorable developmental environments (e.g., family violence and parental quarrels) may be helpful. Third, clinicians should develop early preventive interventions for susceptible middle-aged and older adults (such as those with ELA experience, female gender, lower education, etc.) so as to alleviate the rapid increases in chronic diseases in later adulthood. The integral treatment or management of multimorbidity to mitigate the deleterious health consequences of ELA. Moreover, future studies that identify mechanisms linking ELA with multimorbidity is needed to

1  
2  
3  
4 inform health management strategies and social policies that support long-term health  
5  
6 in middle-aged and older adults.  
7  
8  
9

## 10 11 **Acknowledgements**

12  
13  
14 The authors thank the CHARLS research team, the field team and every respondent for  
15  
16 their time and efforts devoted to the CHARLS project.  
17  
18

## 19 **Funding**

20  
21  
22 This work was supported by the National Natural Science Foundation of China (grant  
23  
24 number 72274222, 72004236), and Humanities and Social Science Fund of Ministry of  
25  
26 Education of China (grant number 23YJC840043).  
27  
28  
29

## 30 **Competing interests**

31  
32 We have no conflicts of interest to disclose.  
33  
34

## 35 **Contributors**

36  
37 Huiying Liu: Conceptualization, Methodology, Writing - original draft, Writing -  
38  
39 review & editing. Mi Zhang: Writing - original draft, Formal analysis. Xinyan Zhang:  
40  
41 Writing - original draft, Formal analysis. Xinyi Zhao: Conceptualization, Methodology,  
42  
43 Writing - original draft, Writing - review & editing. All authors contributed to the  
44  
45 planning, conduct and reporting of this study. All authors had full access to all data and  
46  
47 can take responsibility for the integrity of the data analysis.  
48  
49  
50  
51  
52

## 53 **Data availability statement**

54  
55  
56 Data are available in a public, open access repository. Data were derived from the China  
57  
58 Health and Retirement Longitudinal Study (CHARLS). Researchers who want to use  
59  
60

1  
2  
3  
4 these data can visit <http://charls.pku.edu.cn/>.  
5

### 6 **Ethics approval**

7

8  
9 The CHARLS was approved by the Peking University Ethical Review Committee. The  
10  
11 current study is a secondary analysis of the deidentified CHARLS public data. The  
12  
13  
14 Ethics Review Committee granted an exempt research determination to the current  
15  
16  
17 study.  
18  
19  
20  
21  
22  
23  
24  
25  
26  
27  
28  
29  
30  
31  
32  
33  
34  
35  
36  
37  
38  
39  
40  
41  
42  
43  
44  
45  
46  
47  
48  
49  
50  
51  
52  
53  
54  
55  
56  
57  
58  
59  
60

For peer review only

**Table 1. Sample characteristics by ELA number in CHARLS 2018 (N=9,112)**

| Variables (%)                     | ELA Number |      |      |      | P-value |
|-----------------------------------|------------|------|------|------|---------|
|                                   | 0          | 1-2  | 3-4  | 5-7  |         |
| Number of Chronic Conditions      |            |      |      |      | <0.001  |
| 0-1 condition                     | 38.2       | 33.7 | 28.2 | 21.8 |         |
| 2 conditions                      | 19.5       | 22.8 | 21.5 | 21.1 |         |
| ≥ 3 conditions                    | 42.3       | 43.5 | 50.3 | 57.2 |         |
| Female                            | 63.2       | 56.2 | 46.3 | 44.7 | <0.001  |
| Rural                             | 57.7       | 60.8 | 65.7 | 70.8 | <0.001  |
| Marital Status                    |            |      |      |      | <0.001  |
| married                           | 71.7       | 78.1 | 80.3 | 81.3 |         |
| other status                      | 28.3       | 21.9 | 19.7 | 18.8 |         |
| Educational Attainment            |            |      |      |      | 0.001   |
| below high school                 | 87.2       | 88.8 | 91.0 | 92.1 |         |
| high school and above             | 12.8       | 11.2 | 9.0  | 7.9  |         |
| Receiving <i>Dibao</i> Assistance | 10.8       | 8.3  | 10.9 | 12.4 | <0.001  |
| Types of Medical Insurance        |            |      |      |      | 0.001   |
| none                              | 3.9        | 2.9  | 2.7  | 2.8  |         |
| urban employee                    | 16.1       | 13.4 | 13.2 | 9.3  |         |
| urban and rural resident          | 76.6       | 81.1 | 81.9 | 86.3 |         |
| others                            | 3.5        | 2.6  | 2.2  | 1.6  |         |
| Smoking                           | 65.1       | 58.4 | 51.4 | 51.1 | <0.001  |
| Drinking                          | 72.6       | 67.9 | 63.1 | 61.5 | <0.001  |
| Physical Activity                 |            |      |      |      | <0.001  |
| none                              | 15.7       | 14.2 | 11.8 | 9.5  |         |
| low intensity                     | 40.0       | 35.5 | 31.1 | 26.8 |         |
| moderate intensity                | 29.3       | 27.5 | 26.9 | 26.4 |         |
| high intensity                    | 15.0       | 22.8 | 30.2 | 37.2 |         |

Notes: ELA = early life adversity. The information is from the China Health and Retirement Longitudinal Study 2018. Other status of marriage includes unmarried/divorced/separated/widowed. Urban and rural resident medical insurance integrated urban resident medical insurance and new rural cooperative medical insurance. The results of the chi-square test for variables.

**Table 2. Tabulated BIC and 2ΔBIC**

| Number of Groups | BIC        | Entropy | 2(Δ BIC)  |
|------------------|------------|---------|-----------|
| 1                | -308557.37 | --      | --        |
| 2                | -253000.24 | 0.967   | 111114.26 |
| 3                | -226640.40 | 0.975   | 52719.68  |
| 4                | -213163.38 | 0.976   | 26954.04  |
| 5                | -201166.33 | 0.973   | 23994.10  |
| 6                | -193334.26 | 0.941   | 15664.14  |

Notes: N=9,112. BIC = Bayesian Information Criterion. The closer the entropy is to 1, the better the model fits.

For peer review only



**Table 3. Multinomial logistic regressions for ELA experiences and multimorbidity trajectories (model 1)**

| Variables                                       | Group 2                                      | Group 3                                            | Group 4                          |
|-------------------------------------------------|----------------------------------------------|----------------------------------------------------|----------------------------------|
|                                                 | Low onset-rapidly increasing<br>RRR (95% CI) | Middle onset-moderately increasing<br>RRR (95% CI) | Chronically-high<br>RRR (95% CI) |
| <b>ELA Experiences</b>                          |                                              |                                                    |                                  |
| Parental Illness                                | 1.059 (0.891-1.258)                          | 1.230 (1.054-1.435)                                | 1.885 (1.578-2.251)              |
| Parental Death                                  | 1.032 (0.876-1.215)                          | 1.013 (0.874-1.174)                                | 0.980 (0.816-1.176)              |
| Parental Quarrel/Divorce                        | 1.214 (1.011-1.458)                          | 1.181 (1.000-1.394)                                | 1.262 (1.038-1.536)              |
| Relative Poverty                                | 1.092 (0.944-1.264)                          | 1.210 (1.061-1.379)                                | 1.333 (1.136-1.564)              |
| Food Insufficiency                              | 1.403 (1.197-1.645)                          | 1.372 (1.190-1.582)                                | 1.780 (1.472-2.152)              |
| Domestic Violence                               | 1.132 (0.982-1.305)                          | 1.340 (1.178-1.523)                                | 1.597 (1.360-1.876)              |
| Bullying                                        | 1.051 (0.889-1.243)                          | 1.215 (1.046-1.411)                                | 1.443 (1.208-1.724)              |
| <b>Covariates</b>                               |                                              |                                                    |                                  |
| Female                                          | 1.384 (1.127-1.698)                          | 1.573 (1.308-1.893)                                | 2.499 (1.981-3.154)              |
| Rural                                           | 0.932 (0.797-1.089)                          | 0.921 (0.800-1.061)                                | 0.976 (0.819-1.162)              |
| Marital status (ref: other status)              | 1.337 (1.135-1.574)                          | 1.700 (1.464-1.974)                                | 2.309 (1.897-2.811)              |
| Educational attainment (ref: below high school) | 0.925 (0.720-1.190)                          | 1.085 (0.869-1.355)                                | 1.421 (1.089-1.855)              |
| Receiving <i>Dibao</i> Assistance (ref: no)     | 1.261 (0.982-1.619)                          | 1.422 (1.134-1.783)                                | 2.026 (1.565-1.721)              |
| Types of Medical Insurance (ref: none)          |                                              |                                                    |                                  |
| urban employee                                  | 1.075 (0.689-1.679)                          | 1.241 (0.826-1.865)                                | 1.516 (0.907-2.534)              |
| urban and rural resident                        | 1.019 (0.691-1.502)                          | 1.130 (0.791-1.615)                                | 1.166 (0.739-1.839)              |
| others                                          | 1.084 (0.602-1.951)                          | 1.154 (0.676-1.972)                                | 1.347 (0.686-2.646)              |
| Smoking (ref: no)                               | 1.059 (0.872-1.286)                          | 1.120 (0.941-1.335)                                | 1.381 (1.108-1.721)              |
| Drinking (ref: no)                              | 0.980 (0.837-1.149)                          | 0.952 (0.825-1.098)                                | 0.840 (0.702-1.004)              |
| Physical activity (ref: none)                   |                                              |                                                    |                                  |
| low intensity                                   | 0.966 (0.774-1.206)                          | 1.009 (0.825-1.233)                                | 0.863 (0.676-1.101)              |

1  
2  
3  
4  
5  
6  
7  
8  
9  
10  
11  
12  
13  
14  
15  
16  
17  
18  
19  
20  
21  
22  
23  
24  
25  
26  
27  
28  
29  
30  
31  
32  
33  
34  
35  
36  
37  
38  
39  
40  
41  
42  
43  
44  
45  
46

|                    |                     |                     |                     |
|--------------------|---------------------|---------------------|---------------------|
| moderate intensity | 1.186 (0.938-1.498) | 1.297 (1.049-1.603) | 1.047 (0.811-1.352) |
| high intensity     | 1.016 (0.805-1.283) | 1.082 (0.877-1.337) | 0.824 (0.638-1.064) |

Notes: Reference category was Group 1 (“maintaining-low”). RRR = relative risk ratios. CI = confidence interval. ELA = early life adversity. ref =reference. \*p < .05; \*\*p < .01; \*\*\*p < .001.

**Table 4. Multinomial logistic regressions for ELA experiences and multimorbidity trajectories (model 2)**

| Variables                                       | Group 2                      | Group 3                            | Group 4              |
|-------------------------------------------------|------------------------------|------------------------------------|----------------------|
|                                                 | Low onset-rapidly increasing | Middle onset-moderately increasing | Chronically-high     |
|                                                 | RRR (95% CI)                 | RRR (95% CI)                       | RRR (95% CI)         |
| <b>ELA (ref: none)</b>                          |                              |                                    |                      |
| 1-2                                             | 1.694 (1.284-2.233)          | 1.512 (1.189-1.922)                | 1.975 (1.384-2.819)  |
| 3-4                                             | 2.066 (1.557-2.741)          | 2.148 (1.680-2.746)                | 3.746 (2.621-5.355)  |
| 5-7                                             | 2.625 (1.836-3.755)          | 3.427 (2.505-4.690)                | 7.555 (4.993-11.431) |
| <b>Covariates</b>                               |                              |                                    |                      |
| Female                                          | 1.377 (1.129-1.679)          | 1.540 (1.287-1.841)                | 2.435 (1.946-3.046)  |
| Rural                                           | 0.937 (0.805-1.090)          | 0.922 (0.804-1.058)                | 0.974 (0.822-1.154)  |
| Marital status (ref: other status)              | 1.362(1.163-1.595)           | 1.743 (1.508-2.014)                | 2.362 (1.953-2.856)  |
| Educational attainment (ref: below high school) | 0.943 (0.737-1.207)          | 1.133 (0.912-1.408)                | 1.480 (1.142-1.918)  |
| Receiving <i>Dibao</i> Assistance (ref: no)     | 1.256 (0.990-1.595)          | 1.370 (1.104-1.700)                | 1.962 (1.534-2.510)  |
| Types of Medical Insurance (ref: none)          |                              |                                    |                      |
| urban employee                                  | 1.054 (0.682-1.629)          | 1.183 (0.794-1.762)                | 1.495 (0.902-2.477)  |
| urban and rural resident                        | 1.002 (0.684-1.466)          | 1.101 (0.775-1.562)                | 1.162 (0.714-1.822)  |
| others                                          | 1.007 (0.565-1.793)          | 1.071 (0.635-1.809)                | 1.170 (0.602-2.275)  |
| Smoking (ref: no)                               | 1.065 (0.882-1.288)          | 1.104 (0.931-1.310)                | 1.381 (1.116-1.710)  |
| Drinking (ref: no)                              | 0.974 (0.834-1.137)          | 0.965 (0.839-1.109)                | 0.869 (0.731-1.035)  |

|                               |                     |                     |                     |
|-------------------------------|---------------------|---------------------|---------------------|
| Physical activity (ref: none) |                     |                     |                     |
| low intensity                 | 0.990 (0.800-1.226) | 0.991 (0.817-1.201) | 0.893 (0.706-1.130) |
| moderate intensity            | 1.227 (0.978-1.538) | 1.270 (1.035-1.557) | 1.058 (0.826-1.355) |
| high intensity                | 1.049 (0.837-1.315) | 1.074 (0.877-1.317) | 0.888 (0.693-1.138) |

*Notes:* Reference category was Group 1 (“maintaining-low”). RRR = relative risk ratios. CI = confidence interval. ELA = early life adversity. ref =reference. \*p < .05; \*\*p < .01; \*\*\*p < .001.

## References

1. Boyd C, Smith CD, Masoudi FA et al. Decision Making for Older Adults With Multiple Chronic Conditions: Executive Summary for the American Geriatrics Society Guiding Principles on the Care of Older Adults With Multimorbidity: ACTION STEPS FOR DECISION MAKING WITH MULTIMORBIDITY. *J Am Geriatr Soc* 2019;67:665–73. <https://doi.org/10.1111/jgs.15809>.
2. Maresova P, Javanmardi E, Barakovic S et al. Consequences of chronic diseases and other limitations associated with old age – a scoping review. *BMC Public Health* 2019;19:1431.
3. Yao S-S, Cao G-Y, Han L et al. Prevalence and Patterns of Multimorbidity in a Nationally Representative Sample of Older Chinese: Results From the China Health and Retirement Longitudinal Study. Newman A (ed.). *The Journals of Gerontology: Series A* 2020;75:1974–80. <https://doi.org/10.1093/gerona/glz185>.
4. Anderson E, Durstine JL. Physical activity, exercise, and chronic diseases: A brief review. *Sports Medicine and Health Science* 2019;1:3–10. <https://doi.org/10.1016/j.smhs.2019.08.006>.
5. Strauss VY, Jones PW, Kadam UT et al. Distinct trajectories of multimorbidity in primary care were identified using latent class growth analysis. *Journal of Clinical Epidemiology* 2014;67:1163–71.
6. Hanson HA, Smith KR, Zimmer Z. Reproductive History and Later-Life Comorbidity Trajectories: A Medicare-Linked Cohort Study From the Utah Population Database. *Demography* 2015;52:2021–49. <https://doi.org/10.1016/j.jclinepi.2014.06.003>.
7. Quiñones AR, Botosaneanu A, Markwardt S et al. Racial/ethnic differences in multimorbidity development and chronic disease accumulation for middle-aged adults. Ginsberg SD (ed.). *PLoS ONE* 2019;14:e0218462. <https://doi.org/10.1371/journal.pone.0218462>.
8. Kudesia P, Salimrouny B, Stanley M et al. The incidence of multimorbidity and patterns in accumulation of chronic conditions: A systematic review. *Journal of Multimorbidity and Comorbidity* 2021;11:263355652110328. <https://doi.org/10.1177/26335565211032880>.
9. Vetrano DL, Roso-Llorach A, Fernández S et al. Twelve-year clinical trajectories of multimorbidity in a population of older adults. *Nat Commun* 2020;11:3223.
10. Liu H, Zhang X, Chen B et al. The Differential Impact of Multimorbidity Patterns and Subsequent Accumulation on Longitudinal Trajectories of Physical Function Decline in a Population-Based Cohort of Older People. Fielding R (ed.). *The Journals of Gerontology: Series A* 2022;77:1629–36. <https://doi.org/10.1093/gerona/glab384>.
11. Zhang Z, Yuan M, Shi K et al. Association between multimorbidity trajectories, healthcare utilization, and health expenditures among middle-aged and older adults: China Health and Retirement Longitudinal Study. *Journal of Affective Disorders* 2023;330:24–32.

- 1  
2  
3  
4  
5 <https://doi.org/10.1016/j.jad.2023.02.135>.
- 6  
7 12. Lee SA, Joo S, Chai HW et al. Patterns of multimorbidity trajectories and their correlates  
8 among Korean older adults. *Age and Ageing* 2021;50:1336–41.  
9 <https://doi.org/10.1093/ageing/afab002>.
- 10  
11 13. Kim J-H, Rhee Y, Lee Y. Longitudinal changes in comorbidity patterns over time in  
12 relation to mortality in older Korean adults. *Archives of Gerontology and Geriatrics*  
13 2018;79:63–8. <https://doi.org/10.1016/j.archger.2018.08.004>.
- 14  
15 14. Kuh D, Ben-Shlomo Y eds. *A Life Course Approach to Chronic Disease Epidemiology*.  
16 Oxford ; New York: Oxford University Press, 1997.
- 17  
18 15. Li Y, Xue Q L, Odden M C, et al. Linking early life risk factors to frailty in old age:  
19 evidence from the China Health and Retirement Longitudinal Study. *Age and ageing*, 2020,  
20 49(2): 208-217. <https://doi.org/10.1093/ageing/afz160>.
- 21  
22 16. Mosley-Johnson E, Garacci E, Wagner N, et al. Assessing the relationship between  
23 adverse childhood experiences and life satisfaction, psychological well-being, and social  
24 well-being: United States Longitudinal Cohort 1995–2014. *Quality of Life Research*, 2019,  
25 28: 907-914. <https://doi.org/10.1007/s11136-018-2054-6>.
- 26  
27 17. Fristad, MA, Jedel R, Weller, RA, Weller, EB. Psychosocial functioning in children after  
28 the death of a parent. *The American Journal of Psychiatry* 1993;3: 511–513.  
29 <https://doi.org/10.1176/ajp.150.3.511>.
- 30  
31 18. McLaughlin KA, Sheridan MA, Lambert HK. Childhood adversity and neural  
32 development: Deprivation and threat as distinct dimensions of early experience.  
33 *Neuroscience & Biobehavioral Reviews* 2014;47:578–91.  
34 <https://doi.org/10.1016/j.neubiorev.2014.10.012>.
- 35  
36 19. Lynch J, Smith GD. A LIFE COURSE APPROACH TO CHRONIC DISEASE  
37 EPIDEMIOLOGY. *Annu Rev Public Health* 2005;26:1–35.  
38 <https://doi.org/10.1146/annurev.publhealth.26.021304.144505>.
- 39  
40 20. Ben-Shlomo Y, Kuh D. A life course approach to chronic disease epidemiology:  
41 conceptual models, empirical challenges and interdisciplinary perspectives. *International*  
42 *journal of epidemiology* 2002, 2: 285-293. <https://doi.org/10.1093/ije/31.2.285>.
- 43  
44 21. Fox SE, Levitt P, Nelson III CA. How the Timing and Quality of Early Experiences  
45 Influence the Development of Brain Architecture. *Child Development* 2010;81:28–40.  
46 <https://doi.org/10.1111/j.1467-8624.2009.01380.x>.
- 47  
48 22. Henchoz Y, Seematter-Bagnoud L, Nanchen D et al. Childhood adversity: A gateway to  
49 multimorbidity in older age? *Archives of Gerontology and Geriatrics* 2019;80:31–7.  
50 <https://doi.org/10.1016/j.archger.2018.10.003>.
- 51  
52 23. Sonu S, Post S, Feinglass J. Adverse childhood experiences and the onset of chronic  
53 disease in young adulthood. *Preventive Medicine* 2019;123:163–70.
- 54  
55  
56  
57  
58  
59  
60

- 1  
2  
3  
4  
5 <https://doi.org/10.1016/j.ypped.2019.03.032>.
- 6 24. Buhrmann A S, Fuller-Thomson E. Poorer physical and mental health among older adults  
7 decades after experiencing childhood physical abuse. *Aging and health research*, 2022,  
8 2(3): 100088. <https://doi.org/10.1016/j.ahr.2022.100088>.
- 9  
10  
11 25. Grey K, Gonzales G B, Abera M, et al. Severe malnutrition or famine exposure in  
12 childhood and cardiometabolic non-communicable disease later in life: a systematic  
13 review. *BMJ global health*, 2021, 6(3): e003161. [http://dx.doi.org/10.1136/bmjgh-2020-](http://dx.doi.org/10.1136/bmjgh-2020-003161)  
14 003161.
- 15  
16  
17 26. Lin L, Wang HH, Lu C et al. Adverse Childhood Experiences and Subsequent Chronic  
18 Diseases Among Middle-aged or Older Adults in China and Associations With  
19 Demographic and Socioeconomic Characteristics. *JAMA Netw Open* 2021;4:e2130143.  
20 <https://doi.org/10.1001/jamanetworkopen.2021.30143>.
- 21  
22  
23 27. Dannefer D. Cumulative advantage/disadvantage and the life course: Cross-fertilizing age  
24 and social science theory[J]. *The Journals of Gerontology Series B: Psychological*  
25 *Sciences and Social Sciences*, 2003, 58(6): S327-S337.  
26 <https://doi.org/10.1093/geronb/58.6.S327>
- 27  
28  
29 28. Liu H, Zhang M, Chen B, et al. Links between life-course SES and frailty trajectory  
30 moderated by community environment resources: Person-environment Fit perspective[J].  
31 *Advances in Life Course Research*, 2023, 58: 100580.  
32 <https://doi.org/10.1016/j.alcr.2023.100580>
- 33  
34  
35 29. Zhao Y, Strauss J, Chen X, Wang Y, Gong J, Meng Q, Wang G, Wang H. China Health  
36 and Retirement Longitudinal Study Wave 4 user's guide. National School of Development,  
37 Peking University; 2020.
- 38  
39  
40 30. Koyanagi A, Garin N, Olaya B et al. Chronic Conditions and Sleep Problems among  
41 Adults Aged 50 years or over in Nine Countries: A Multi-Country Study. Xia Y (ed.).  
42 *PLoS ONE* 2014;9:e114742. <https://doi.org/10.1371/journal.pone.0114742>.
- 43  
44  
45 31. Watson KB, Carlson SA, Gunn JP et al. Physical Inactivity Among Adults Aged 50 Years  
46 and Older — United States, 2014. *MMWR Morb Mortal Wkly Rep* 2016;65:954–8.  
47 <https://www.jstor.org/stable/24858967>.
- 48  
49  
50 32. Shi Z L, Wu Z M. The long term consequences of early life misfortune on health inequality.  
51 *Sociological Studies*, 2018, 33(3): 166-194.  
52 <https://doi.org/10.19934/j.cnki.shxyj.2018.03.008>.
- 53  
54  
55 33. Wagner C, Carmeli C, Chiolerio A, et al. Life course socioeconomic conditions and  
56 multimorbidity in old age—A scoping review[J]. *Ageing research reviews*, 2022, 78:  
57 101630. <https://doi.org/10.1016/j.arr.2022.101630>.
- 58  
59  
60 34. Arshadipour, A., Thorand, B., Linkohr, B. et al. Impact of prenatal and childhood  
adversity effects around World War II on multimorbidity: results from the KORA-Age

- study. *BMC Geriatr* 22, 115 (2022). <https://doi.org/10.1186/s12877-022-02793-2>.
35. Jones BL, Nagin DS. Advances in Group-Based Trajectory Modeling and an SAS Procedure for Estimating Them. *Sociological Methods & Research* 2007;35:542–71. <https://doi.org/10.1177/0049124106292364>.
36. Nagin D S. Analyzing developmental trajectories: a semiparametric, group-based approach. *Psychological methods*, 1999, 4(2): 139. <https://doi.org/10.1037/1082-989X.4.2.139>.
37. Nagin D S, Jones B L, Passos V L, et al. Group-based multi-trajectory modeling. *Statistical methods in medical research*, 2018, 27(7): 2015-2023. <https://doi.org/10.1177/0962280216673085>.
38. Haviland AM, Jones BL, Nagin DS. Group-based Trajectory Modeling Extended to Account for Nonrandom Participant Attrition. *Sociological Methods & Research* 2011;40:367–90. <https://doi.org/10.1177/0049124111400041>.
39. Nagin D. Group-based modeling of development[M]. Harvard University Press, 2005.
40. Nagin DS. Group-Based Trajectory Modeling: An Overview. In: Piquero AR, Weisburd D (eds.). *Handbook of Quantitative Criminology*. New York, NY: Springer, 2010, 53–67. <https://doi.org/10.1177/0049124111400041>.
41. Jackson CA, Dobson A, Tooth L et al. Body mass index and socioeconomic position are associated with 9-year trajectories of multimorbidity: A population-based study. *Preventive Medicine* 2015;81:92–8. <https://doi.org/10.1016/j.ypmed.2015.08.013>.
42. Su B, Li D, Xie J et al. Chronic Disease in China: Geographic and Socioeconomic Determinants Among Persons Aged 60 and Older. *Journal of the American Medical Directors Association* 2023;24:206-212.e5. <https://doi.org/10.1016/j.jamda.2022.10.002>.
43. Pivetta NRS, Marincolo JCS, Neri AL et al. Multimorbidity, frailty and functional disability in octogenarians: A structural equation analysis of relationship. *Archives of Gerontology and Geriatrics* 2020;86:103931. <https://doi.org/10.1016/j.archger.2019.103931>.
44. Canizares M, Hogg-Johnson S, Gignac M A M, et al. Increasing trajectories of multimorbidity over time: birth cohort differences and the role of changes in obesity and income[J]. *The Journals of Gerontology: Series B*, 2018, 73(7): 1303-1314. <https://doi.org/10.1093/geronb/gbx004>.
45. Wang J, Li Y, Han X et al. Exposure to the Chinese Famine in Childhood Increases Type 2 Diabetes Risk in Adults. *The Journal of Nutrition* 2016;146:2289–95. <https://doi.org/10.3945/jn.116.234575>.
46. Hu X F, Liu G G, Fan M. Long - Term Effects of Famine on Chronic Diseases: Evidence from China's Great Leap Forward Famine[J]. *Health Economics*, 2017, 26(7): 922-936. <https://doi.org/10.1002/hec.3371>.



- 1  
2  
3  
4  
5 47. Wells J C K. The capacity–load model of non-communicable disease risk: understanding  
6 the effects of child malnutrition, ethnicity and the social determinants of health[J].  
7 European journal of clinical nutrition, 2018, 72(5): 688-697.  
8  
9 48. Marsh S, Dobson R, Maddison R. The relationship between household chaos and child,  
10 parent, and family outcomes: a systematic scoping review. BMC Public Health  
11 2020;20:513.  
12  
13 49. Santini ZI, Koyanagi A, Stewart-Brown S et al. Cumulative risk of compromised physical,  
14 mental and social health in adulthood due to family conflict and financial strain during  
15 childhood: a retrospective analysis based on survey data representative of 19 European  
16 countries. BMJ Glob Health 2021;6:e004144. <http://dx.doi.org/10.1136/bmjgh-2020-004144>.  
17  
18 50. Miller G E, Chen E, Parker K J. Psychological stress in childhood and susceptibility to the  
19 chronic diseases of aging: moving toward a model of behavioral and biological  
20 mechanisms[J]. Psychological bulletin, 2011, 137(6): 959.  
21 <https://doi.org/10.1037/a0024768>.  
22  
23 51. McCrory C, Dooley C, Layte R, Kenny RA. The lasting legacy of childhood adversity for  
24 disease risk in later life. Health Psychology 2015;7:687.  
25 <https://doi.org/10.1037/hea0000147>.  
26  
27 52. Lee C, Park S. Examining Cumulative Inequality in the Association Between Childhood  
28 Socioeconomic Status and Body Mass Index From Midlife to Old Age. Zajacova A (ed.).  
29 The Journals of Gerontology: Series B 2020;75:1264–74.  
30 <https://doi.org/10.1093/geronb/gbz081>.  
31  
32 53. Ferraro KF, Shippee TP. Aging and Cumulative Inequality: How Does Inequality Get  
33 Under the Skin? The Gerontologist 2009;49:333–43.  
34 <https://doi.org/10.1093/geront/gnp034>.  
35  
36 54. Nurius PS, Green S, Logan-Greene P et al. Life course pathways of adverse childhood  
37 experiences toward adult psychological well-being: A stress process analysis. Child Abuse  
38 & Neglect 2015;45:143–53. <https://doi.org/10.1016/j.chiabu.2015.03.008>.  
39  
40 55. Duffy K A, McLaughlin K A, Green P A. Early life adversity and health-risk behaviors:  
41 proposed psychological and neural mechanisms[J]. Annals of the New York Academy of  
42 Sciences, 2018, 1428(1): 151-169. <https://doi.org/10.1111/nyas.13928>.  
43  
44 56. Daelmans B, Darmstadt GL, Lombardi J et al. Early childhood development: the  
45 foundation of sustainable development. The Lancet 2017;389:9–11.  
46 [https://doi.org/10.1016/S0140-6736\(16\)31659-2](https://doi.org/10.1016/S0140-6736(16)31659-2).  
47  
48  
49  
50  
51  
52  
53  
54  
55  
56

## 57 **FIGURE TITLES**

58  
59  
60



1  
2  
3  
4  
5 **Figure 1.** Sample selection

6 **Figure 2.** Long-term trajectories of multimorbidity  
7  
8  
9  
10  
11  
12  
13  
14  
15  
16  
17  
18  
19  
20  
21  
22  
23  
24  
25  
26  
27  
28  
29  
30  
31  
32  
33  
34  
35  
36  
37  
38  
39  
40  
41  
42  
43  
44  
45  
46  
47  
48  
49  
50  
51  
52  
53  
54  
55  
56  
57  
58  
59  
60

For peer review only

1  
2  
3  
4  
5  
6  
7  
8  
9  
10  
11  
12  
13  
14  
15  
16  
17  
18  
19  
20  
21  
22  
23  
24  
25  
26  
27  
28  
29  
30  
31  
32  
33  
34  
35  
36  
37  
38  
39  
40  
41  
42  
43  
44  
45  
46  
47  
48  
49  
50  
51  
52  
53  
54  
55  
56  
57  
58  
59  
60

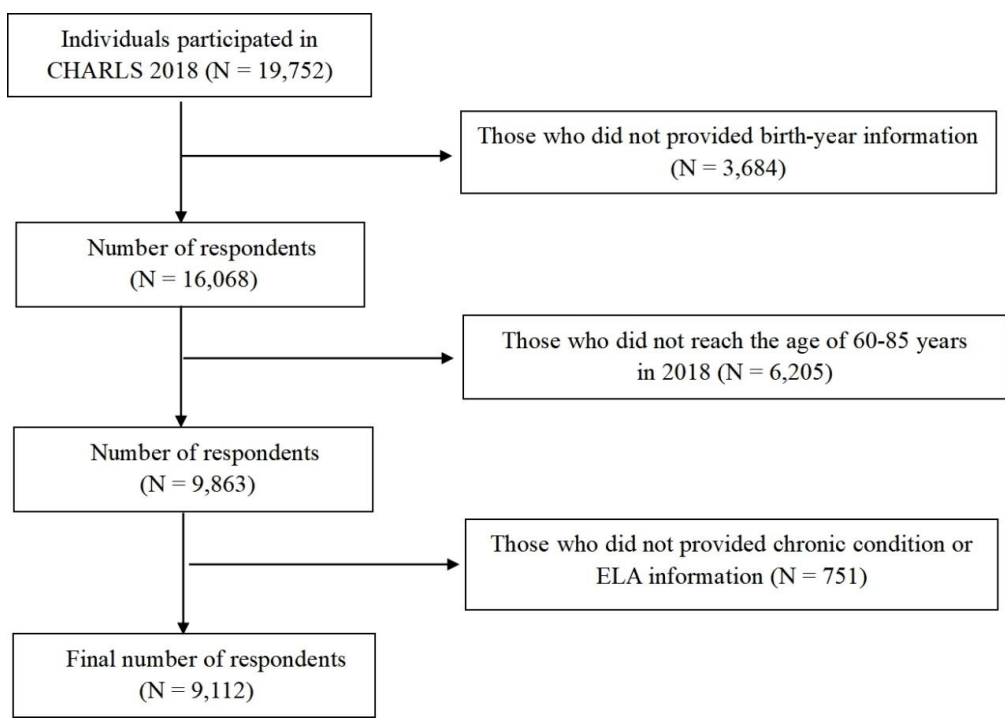

146x103mm (220 x 220 DPI)

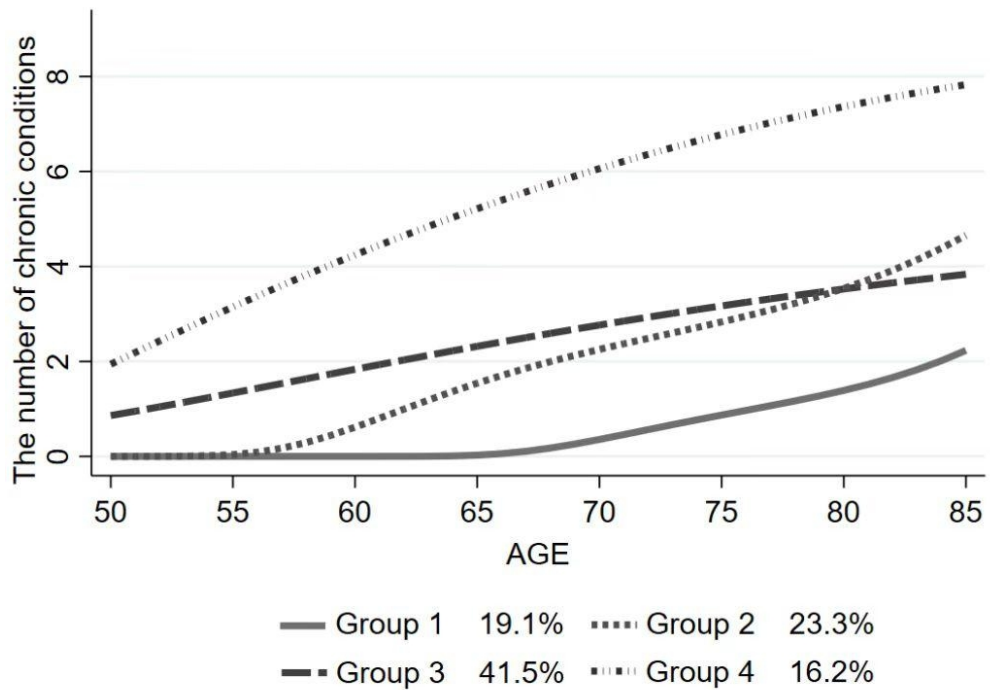

136x99mm (192 x 192 DPI)

1  
2  
3  
4 **Supplemental Figures**  
5  
6

7 **eFigure 1** Retracing the Development of Chronic Disease in the Sample  
8  
9  
10  
11  
12  
13  
14  
15  
16  
17  
18  
19  
20  
21  
22  
23  
24  
25  
26  
27  
28  
29  
30  
31  
32  
33  
34  
35  
36  
37  
38  
39  
40  
41  
42  
43  
44  
45  
46  
47  
48  
49  
50  
51  
52  
53  
54  
55  
56  
57  
58  
59  
60

For peer review only

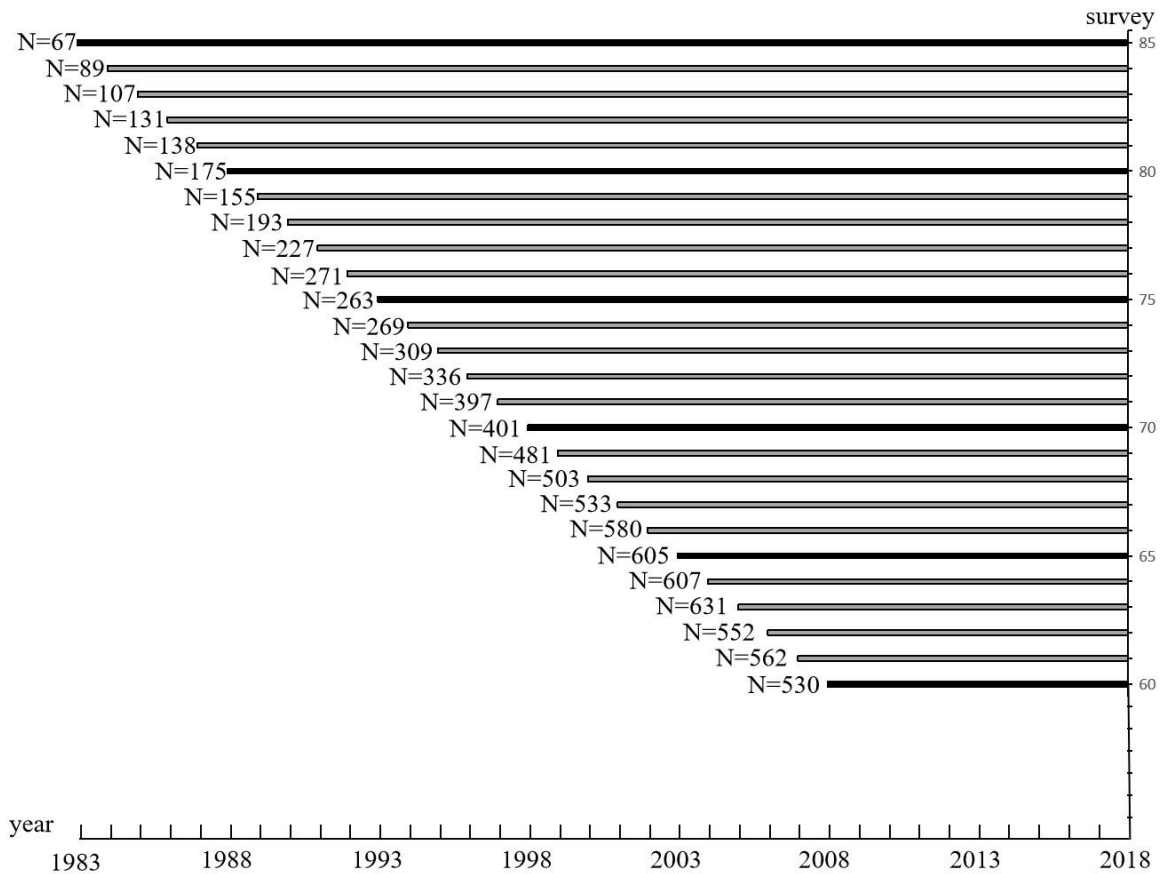

**eFigure 1 Retracing the Development of Chronic Disease in the Sample.**

N = number; The total number of respondents was 9,112.

1  
2  
3  
4  
5  
6  
7  
8  
9  
10  
11  
12  
13  
14  
15  
16  
17  
18  
19  
20  
21  
22  
23  
24  
25  
26  
27  
28  
29  
30  
31  
32  
33  
34  
35  
36  
37  
38  
39  
40  
41  
42  
43  
44  
45  
46  
47  
48  
49  
50  
51  
52  
53  
54  
55  
56  
57  
58  
59  
60

For peer review only

1  
2  
3  
4  
5 **Supplemental Table1, 3-9**  
6  
7  
8

9 **eTable 1** Questionnaire Items and Prevalence of Each ELA Indicator

10  
11 **eTable 3** Tabulated BIC and  $2\Delta\text{BIC}$  (using 12 chronic conditions)

12  
13 **eTable 4** Sample Characteristics by Multimorbidity Trajectories in CHARLS 2018 (N=9,112)

14  
15 **eTable 5** Multinomial Logistic Regression Models for nine types of ELA Experiences and Multimorbidity Trajectories

16  
17 **eTable 6** Multinomial Logistic Regressions for ELA Experiences (Male, N=4,440)

18  
19 **eTable 7** Multinomial Logistic Regressions for ELA Experiences ( Female, N=4,672)

20  
21 **eTable 8** Multinomial Logistic Regressions for ELA Experiences (Urban, N=3,305)

22  
23 **eTable 9** Multinomial Logistic Regressions for ELA Experiences (Rural, N=5,807)  
24  
25  
26  
27  
28  
29  
30  
31  
32  
33  
34  
35  
36  
37  
38  
39  
40  
41  
42  
43  
44  
45  
46

**eTable 1 Questionnaire Items and Prevalence of Each ELA Indicator**

| Types of ELA             | Questionnaire Items                                                                                                                                                                                                                                                                                                                                                                                                                              | Prevalence (%) |
|--------------------------|--------------------------------------------------------------------------------------------------------------------------------------------------------------------------------------------------------------------------------------------------------------------------------------------------------------------------------------------------------------------------------------------------------------------------------------------------|----------------|
| Parental Illness         | Did your female/male guardian have a long time be sick on bed when you were young? (yes <sup>a</sup> , no)<br>Did your female/male guardian have a serious deformity when you were young? (yes <sup>a</sup> , no)                                                                                                                                                                                                                                | 23.5%          |
| Parental Death           | Did your female/male guardian have abnormality of mind when you were young? (yes <sup>a</sup> , no)<br>Is your biological mother/biological father alive? (yes <sup>a</sup> , no)                                                                                                                                                                                                                                                                | 23.0%          |
| Parental Quarrel/Divorce | Did your parents often quarrel? (often <sup>a</sup> , sometimes <sup>a</sup> , not very often <sup>a</sup> , never)<br>Were your biological parents divorced? (yes <sup>a</sup> , no)                                                                                                                                                                                                                                                            | 19.3%          |
| Relative Poverty         | When you were a child before age 17, compared to the average family in the same community/village at that time, how was your family's financial situation? (a lot better off than them, somewhat better off than them, same as them, somewhat worse off than them <sup>a</sup> , a lot worse off than them <sup>a</sup> )                                                                                                                        | 41.1%          |
| Food Insufficiency       | When you were a child before age 17 was there ever a time when your family did not have enough food to eat? (yes <sup>a</sup> , no)                                                                                                                                                                                                                                                                                                              | 77.9%          |
| Domestic Violence        | When you were growing up, did your female/male guardian ever hit you? Was that often, sometimes, rarely, or never? (often <sup>a</sup> , sometimes <sup>a</sup> , rarely <sup>a</sup> , never)                                                                                                                                                                                                                                                   | 56.9%          |
| Bullying                 | When you were a child, how often were you picked on or bullied by kids in your neighborhood? Is it often, sometimes, rarely or never? (often <sup>a</sup> , sometimes <sup>a</sup> , not very often <sup>a</sup> , never)<br>When you were a child, how often were you picked on or bullied by kids in your school? Is it often, sometimes, rarely or never? (often <sup>a</sup> , sometimes <sup>a</sup> , not very often <sup>a</sup> , never) | 26.5%          |
| Poor Physical Health     | Before you were 15 years old (including 15 years old), would you say that compared to other children of the same age, you were (much healthier, somewhat healthier, about average, somewhat less healthy <sup>a</sup> , much less healthy <sup>a</sup> )                                                                                                                                                                                         | 13.1%          |
| Loneliness               | When you were a child, how often did you feel lonely for not having friends? Is it often, sometimes, not very often or never? (often <sup>a</sup> , sometimes <sup>a</sup> , not very often <sup>a</sup> , never)                                                                                                                                                                                                                                | 13.4%          |

Notes: ELA = early life adversity. <sup>a</sup> Answers indicate thresholds for ELA. Prevalence indicates the proportion of individuals who have experienced ELA. "Poor



Physical Health” and “Loneliness” are two additional indicators of ELA added for sensitivity analysis.

**eTable 3 Tabulated BIC and 2ΔBIC (using 12 chronic conditions)**

| Number of Groups | BIC        | Entropy | 2(ΔBIC)   |
|------------------|------------|---------|-----------|
| 1                | -302678.31 | .       | .         |
| 2                | -245853.85 | 0.972   | 113648.92 |
| 3                | -219850.02 | 0.976   | 52007.66  |
| 4                | -206847.93 | 0.980   | 26004.18  |
| 5                | -194196.80 | 0.979   | 25302.26  |
| 6                | -186460.39 | 0.945   | 15472.82  |

*Notes:* The GBTM analyses using 12 chronic conditions (excluding memory-related and emotional/psychiatric problems given their low prevalence in the study population). N=9,112. BIC = Bayesian Information Criterion. The closer the entropy is to 1, the better the model fits.

**eTable 4 Sample Characteristics by Multimorbidity Trajectories  
in CHARLS 2018 (N=9,112)**

| Variables (%)                     | Multimorbidity Trajectories |         |         |         | P-value |
|-----------------------------------|-----------------------------|---------|---------|---------|---------|
|                                   | Group 1                     | Group 2 | Group 3 | Group 4 |         |
| Female                            | 45.8                        | 51.0    | 51.7    | 57.1    | <0.001  |
| Rural                             | 65.1                        | 63.6    | 63.0    | 64.3    | 0.464   |
| Marital Status                    |                             |         |         |         | <0.001  |
| married                           | 72.3                        | 77.3    | 81.2    | 83.6    |         |
| other status                      | 27.7                        | 22.7    | 18.8    | 16.4    |         |
| Educational Attainment            |                             |         |         |         | 0.116   |
| below high school                 | 90.4                        | 90.9    | 89.8    | 88.5    |         |
| high school and above             | 9.6                         | 9.1     | 10.2    | 11.5    |         |
| Receiving <i>Dibao</i> Assistance | 92.0                        | 90.6    | 90.1    | 86.8    | <0.001  |
| Types of Medical Insurance        |                             |         |         |         | 0.656   |
| none                              | 3.3                         | 3.2     | 2.8     | 2.3     |         |
| urban employee                    | 12.2                        | 12.5    | 13.2    | 14.1    |         |
| urban and rural resident          | 82.0                        | 82.0    | 81.7    | 81.2    |         |
| others                            | 2.6                         | 2.3     | 2.3     | 2.4     |         |
| Smoking                           | 52.2                        | 55.3    | 55.6    | 56.9    | 0.038   |
| Drinking                          | 63.2                        | 65.3    | 65.2    | 69.3    | 0.004   |
| Physical Activity                 |                             |         |         |         | 0.020   |
| none                              | 13.6                        | 12.6    | 12.1    | 13.7    |         |
| low intensity                     | 35.7                        | 33.0    | 31.9    | 32.8    |         |
| moderate intensity                | 23.8                        | 27.6    | 28.7    | 26.9    |         |
| high intensity                    | 26.9                        | 26.7    | 27.4    | 26.6    |         |

*Notes:* ELA = early life adversity. The information is from the China Health and Retirement Longitudinal Study 2018. Other status of marriage includes unmarried/divorced/separated/widowed. Urban and rural resident medical insurance integrated urban resident medical insurance and new rural cooperative medical insurance. The results of the chi-square test for variables.

**eTable 5 Multinomial Logistic Regression Models for nine types of ELA Experiences and Multimorbidity Trajectories**

| Variables                | Group 2                      | Group 3                            | Group 4                 |
|--------------------------|------------------------------|------------------------------------|-------------------------|
|                          | Low onset-rapidly increasing | Middle onset-moderately increasing | Chronically-high        |
|                          | RRR (95% CI)                 | RRR (95% CI)                       | RRR (95% CI)            |
| <b>Model 1</b>           |                              |                                    |                         |
| Parental Illness         | 1.050 (0.883-1.250)          | 1.220 (1.044-1.425)*               | 1.816 (1.517-2.173)***  |
| Parental Death           | 1.015 (0.860-1.197)          | 0.994 (0.856-1.154)                | 0.935 (0.777-1.125)     |
| Parental Quarrel/Divorce | 1.206 (1.003-1.449)*         | 1.166 (0.986-1.377)                | 1.230 (1.010-1.499)*    |
| Relative Poverty         | 1.069 (0.922-1.238)          | 1.176 (1.030-1.344)*               | 1.229 (1.045-1.446)*    |
| Food Insufficiency       | 1.413 (1.204-1.659)***       | 1.366 (1.183-1.576)***             | 1.768 (1.461-2.141)***  |
| Domestic Violence        | 1.128 (0.978-1.302)          | 1.343 (1.180-1.528)***             | 1.586 (1.349-1.865)***  |
| Bullying                 | 1.046 (0.882-1.239)          | 1.188 (1.021-1.383)*               | 1.377 (1.149-1.650)**   |
| Poor Physical Health     | 1.333 (1.050-1.692)*         | 1.613 (1.302-1.998)***             | 2.317 (1.827-2.939)***  |
| Loneliness               | 0.973 (0.785-1.207)          | 1.028 (0.848-1.246)                | 1.160 (0.924-1.458)     |
| <b>Model 2</b>           |                              |                                    |                         |
| ELA (ref: none)          |                              |                                    |                         |
| 1-2                      | 1.668 (1.248-2.229)**        | 1.483 (1.151-1.910)**              | 2.119 (1.430-3.138)***  |
| 3-4                      | 2.088 (1.556-2.803)***       | 2.205 (1.706-2.851)***             | 4.088 (2.760-6.054)***  |
| 5-9                      | 2.278 (1.632-3.180)***       | 3.016 (2.254-4.035)***             | 7.862 (5.173-11.947)*** |

Notes: Reference category was Group 1 ("maintaining-low"). RRR = relative risk ratios. CI = confidence interval. ELA = early life adversity. ref =reference.

\*p < .05; \*\*p < .01; \*\*\*p < .001. Model adjusted for gender, residence area, marital status, educational attainment, types of medical insurance, and whether receive *Dibao* assistance, smoking, drinking, and physical activity.

**eTable 6 Multinomial Logistic Regressions for ELA Experiences (Male, N=4,440)**

| Variables                | Group 2                      | Group 3                            | Group 4                 |
|--------------------------|------------------------------|------------------------------------|-------------------------|
|                          | Low onset-rapidly increasing | Middle onset-moderately increasing | Chronically-high        |
|                          | RRR (95% CI)                 | RRR (95% CI)                       | RRR (95% CI)            |
| <b>Model 1</b>           |                              |                                    |                         |
| Parental Illness         | 0.884 (0.693-1.128)          | 1.140 (0.923-1.407)                | 1.756 (1.363-2.261)***  |
| Parental Death           | 1.028 (0.820-1.288)          | 1.052 (0.860-1.286)                | 1.045 (0.808-1.351)     |
| Parental Quarrel/Divorce | 1.111 (0.862-1.433)          | 1.172 (0.935-1.469)                | 1.134 (0.855-1.505)     |
| Relative Poverty         | 1.053 (0.861-1.288)          | 1.216 (1.016-1.454)*               | 1.343 (1.069-1.687)*    |
| Food Insufficiency       | 1.444 (1.151-1.812)**        | 1.548 (1.263-1.897)***             | 1.873 (1.404-2.499)***  |
| Domestic Violence        | 1.056 (0.864-1.290)          | 1.196 (0.998-1.434)                | 1.440 (1.130-1.835)**   |
| Bullying                 | 0.957 (0.769-1.190)          | 1.124 (0.928-1.362)                | 1.324 (1.042-1.683)*    |
| <b>Model 2</b>           |                              |                                    |                         |
| ELA (ref: none)          |                              |                                    |                         |
| 1-2                      | 2.145 (1.365-3.370)**        | 1.621 (1.108-2.372)*               | 1.919 (1.072-3.435)*    |
| 3-4                      | 2.241 (1.425-3.524)***       | 2.249 (1.539-3.287)***             | 3.018 (1.695-5.374)***  |
| 5-7                      | 2.284 (1.341-3.891)**        | 3.214 (2.058-5.020)***             | 6.224 (3.316-11.683)*** |

Notes: Reference category was Group 1 (“maintaining-low”). RRR = relative risk ratios. CI = confidence interval. ELA = early life adversity. ref =reference. \*p < .05; \*\*p < .01; \*\*\*p < .001. Model adjusted for residence area, marital status, educational attainment, types of medical insurance, and whether receive *Dibao* assistance, smoking, drinking, and physical activity.

eTable 7 Multinomial Logistic Regressions for ELA Experiences ( Female, N=4,672)

| Variables                | Group 2                      | Group 3                            | Group 4                 |
|--------------------------|------------------------------|------------------------------------|-------------------------|
|                          | Low onset-rapidly increasing | Middle onset-moderately increasing | Chronically-high        |
|                          | RRR (95% CI)                 | RRR (95% CI)                       | RRR (95% CI)            |
| <b>Model 1</b>           |                              |                                    |                         |
| Parental Illness         | 1.273 (0.993-1.633)          | 1.351 (1.076-1.696)*               | 2.061 (1.599-2.656)***  |
| Parental Death           | 1.030 (0.810-1.308)          | 0.965 (0.775-1.201)                | 0.905 (0.697-1.176)     |
| Parental Quarrel/Divorce | 1.321 (1.012-1.724)*         | 1.194 (0.934-1.527)                | 1.374 (1.041-1.815)*    |
| Relative Poverty         | 1.128 (0.912-1.395)          | 1.217 (1.003-1.477)*               | 1.332 (1.061-1.670)*    |
| Food Insufficiency       | 1.350 (1.078-1.690)**        | 1.234 (1.009-1.509)*               | 1.699 (1.315-2.195)***  |
| Domestic Violence        | 1.219 (0.993-1.497)          | 1.521 (1.263-1.831)***             | 1.777 (1.426-2.215)***  |
| Bullying                 | 1.254 (0.959-1.640)          | 1.401 (1.098-1.789)**              | 1.692 (1.286-2.227)***  |
| <b>Model 2</b>           |                              |                                    |                         |
| ELA (ref: none)          |                              |                                    |                         |
| 1-2                      | 1.412 (0.991-2.013)          | 1.445 (1.057-1.975)*               | 1.949 (1.241-3.060)**   |
| 3-4                      | 2.013 (1.390-2.916)***       | 2.147 (1.546-2.983)***             | 4.408 (2.784-6.979)***  |
| 5-7                      | 3.588 (2.120-6.074)***       | 4.212 (2.601-6.819)***             | 9.444 (5.237-17.030)*** |

Notes: Reference category was Group 1 ("maintaining-low"). RRR = relative risk ratios. CI = confidence interval. ELA = early life adversity. ref =reference.

\*p < .05; \*\*p < .01; \*\*\*p < .001. Model adjusted for residence area, marital status, educational attainment, types of medical insurance, and whether receive *Dibao* assistance, smoking, drinking, and physical activity.

**eTable 8 Multinomial Logistic Regressions for ELA Experiences (Urban , N=3,305)**

| Variables                | Group 2                      | Group 3                            | Group 4                 |
|--------------------------|------------------------------|------------------------------------|-------------------------|
|                          | Low onset-rapidly increasing | Middle onset-moderately increasing | Chronically-high        |
|                          | RRR (95% CI)                 | RRR (95% CI)                       | RRR (95% CI)            |
| <b>Model 1</b>           |                              |                                    |                         |
| Parental Illness         | 1.086 (0.794-1.484)          | 1.198 (0.905-1.585)                | 1.673 (1.210-2.313)**   |
| Parental Death           | 1.060 (0.793-1.416)          | 1.021 (0.786-1.327)                | 1.031 (0.746-1.425)     |
| Parental Quarrel/Divorce | 1.207 (0.889-1.639)          | 1.110 (0.841-1.465)                | 1.195 (0.860-1.662)     |
| Relative Poverty         | 1.111 (0.858-1.438)          | 1.324 (1.049-1.670)*               | 1.419 (1.072-1.879)*    |
| Food Insufficiency       | 1.518 (1.170-1.970)**        | 1.415 (1.123-1.784)**              | 1.837 (1.355-2.490)***  |
| Domestic Violence        | 1.166 (0.917-1.484)          | 1.385 (1.115-1.722)**              | 1.640 (1.249-2.154)***  |
| Bullying                 | 1.069 (0.800-1.429)          | 1.250 (0.965-1.619)                | 1.689 (1.246-2.291)**   |
| <b>Model 2</b>           |                              |                                    |                         |
| ELA (ref: none)          |                              |                                    |                         |
| 1-2                      | 1.709 (1.118-2.614)*         | 1.821 (1.245-2.663)**              | 2.378 (1.365-4.143)**   |
| 3-4                      | 2.113 (1.359-3.285)**        | 2.652 (1.788-3.933)***             | 4.394 (2.497-7.732)***  |
| 5-7                      | 3.195 (1.718-5.944)***       | 4.463 (2.546-7.824)***             | 9.875 (4.867-20.032)*** |

Notes: Reference category was Group 1 (“maintaining-low”). RRR = relative risk ratios. CI = confidence interval. ELA = early life adversity. ref =reference. \*p < .05; \*\*p < .01; \*\*\*p < .001. Model adjusted for gender, marital status, educational attainment, types of medical insurance, and whether receive *Dibao* assistance, smoking, drinking, and physical activity.

**eTable 9 Multinomial Logistic Regressions for ELA Experiences (Rural, N=5,807)**

| Variables                | Group 2                      | Group 3                            | Group 4                 |
|--------------------------|------------------------------|------------------------------------|-------------------------|
|                          | Low onset-rapidly increasing | Middle onset-moderately increasing | Chronically-high        |
|                          | RRR (95% CI)                 | RRR (95% CI)                       | RRR (95% CI)            |
| <b>Model 1</b>           |                              |                                    |                         |
| Parental Illness         | 1.049 (0.852-1.290)          | 1.244 (1.034-1.496)*               | 2.009 (1.623-2.486)***  |
| Parental Death           | 1.022 (0.837-1.246)          | 1.011 (0.845-1.209)                | 0.963 (0.772-1.202)     |
| Parental Quarrel/Divorce | 1.214 (0.965-1.526)          | 1.218 (0.990-1.498)                | 1.294 (1.013-1.653)*    |
| Relative Poverty         | 1.086 (0.910-1.296)          | 1.160 (0.989-1.360)                | 1.304 (1.072-1.584)**   |
| Food Insufficiency       | 1.337 (1.093-1.636)**        | 1.339 (1.117-1.605)**              | 1.761 (1.379-2.250)***  |
| Domestic Violence        | 1.118 (0.937-1.334)          | 1.321 (1.126-1.549)**              | 1.586 (1.298-1.936)***  |
| Bullying                 | 1.040 (0.846-1.279)          | 1.203 (1.001-1.446)*               | 1.337 (1.073-1.666)*    |
| <b>Model 2</b>           |                              |                                    |                         |
| ELA (ref: none)          |                              |                                    |                         |
| 1-2                      | 1.693 (1.173-2.442)**        | 1.325 (0.971-1.810)                | 1.762 (1.107-2.803)*    |
| 3-4                      | 2.037 (1.405-2.954)***       | 1.856 (1.354-2.545)***             | 3.429 (2.156-5.453)***  |
| 5-7                      | 2.426 (1.547-3.804)***       | 2.917 (1.983-4.291)***             | 6.606 (3.920-11.132)*** |

Notes: Reference category was Group 1 ("maintaining-low"). RRR = relative risk ratios. CI = confidence interval. ELA = early life adversity. ref =reference.

\*p < .05; \*\*p < .01; \*\*\*p < .001. Model adjusted for gender, marital status, educational attainment, types of medical insurance, and whether receive *Dibao* assistance, smoking, drinking, and physical activity.

STROBE Statement—checklist of items that should be included in reports of observational studies  
(Page numbers refer to those on original submitted word document)

For manuscript: “Early-Life Adversity Predicts Distinct Trajectories of Multimorbidity with Ageing from 50 to 85 years: A Nationwide Longitudinal Study”, submitted by Huiying Liu et al., 075834

|                              | Item No | Recommendation                                                                                                                                                                       | Item page |
|------------------------------|---------|--------------------------------------------------------------------------------------------------------------------------------------------------------------------------------------|-----------|
| <b>Title and abstract</b>    | 1       | (a) Indicate the study’s design with a commonly used term in the title or the abstract                                                                                               | 2         |
|                              |         | (b) Provide in the abstract an informative and balanced summary of what was done and what was found                                                                                  | 3-4       |
| <b>Introduction</b>          |         |                                                                                                                                                                                      |           |
| Background/rationale         | 2       | Explain the scientific background and rationale for the investigation being reported                                                                                                 | 5-8       |
| Objectives                   | 3       | State specific objectives, including any prespecified hypotheses                                                                                                                     | 7-8       |
| <b>Methods</b>               |         |                                                                                                                                                                                      |           |
| Study design                 | 4       | Present key elements of study design early in the paper                                                                                                                              | 8-14      |
| Setting                      | 5       | Describe the setting, locations, and relevant dates, including periods of recruitment, exposure, follow-up, and data collection                                                      | 8-9       |
| Participants                 | 6       | (a) <i>Cohort study</i> —Give the eligibility criteria, and the sources and methods of selection of participants. Describe methods of follow-up                                      | 8-9       |
| Variables                    | 7       | Clearly define all outcomes, exposures, predictors, potential confounders, and effect modifiers. Give diagnostic criteria, if applicable                                             | 10-11     |
| Data sources/<br>measurement | 8*      | For each variable of interest, give sources of data and details of methods of assessment (measurement). Describe comparability of assessment methods if there is more than one group | 8-14      |
| Bias                         | 9       | Describe any efforts to address potential sources of bias                                                                                                                            | N/A       |
| Study size                   | 10      | Explain how the study size was arrived at                                                                                                                                            | 8-9       |
| Quantitative variables       | 11      | Explain how quantitative variables were handled in the analyses. If applicable, describe which groupings were chosen and why                                                         | 9-11      |
| Statistical methods          | 12      | (a) Describe all statistical methods, including those used to control for confounding                                                                                                | 11-13     |
|                              |         | (b) Describe any methods used to examine subgroups and interactions                                                                                                                  | 11-13     |
|                              |         | (c) Explain how missing data were addressed                                                                                                                                          | N/A       |
|                              |         | (d) <i>Cohort study</i> —If applicable, explain how loss to follow-up was addressed                                                                                                  | N/A       |
|                              |         | (e) Describe any sensitivity analyses                                                                                                                                                | 14        |

Continued on next page



| <b>Results</b>           |     |                                                                                                                                                                                                              |                     |
|--------------------------|-----|--------------------------------------------------------------------------------------------------------------------------------------------------------------------------------------------------------------|---------------------|
| Participants             | 13* | (a) Report numbers of individuals at each stage of study—eg numbers potentially eligible, examined for eligibility, confirmed eligible, included in the study, completing follow-up, and analysed            | 8-9 (plus Figure 1) |
|                          |     | (b) Give reasons for non-participation at each stage                                                                                                                                                         | 8-9 (plus Figure 1) |
|                          |     | (c) Consider use of a flow diagram                                                                                                                                                                           | Figure 1            |
| Descriptive data         | 14* | (a) Give characteristics of study participants (eg demographic, clinical, social) and information on exposures and potential confounders                                                                     | 14                  |
|                          |     | (b) Indicate number of participants with missing data for each variable of interest                                                                                                                          | N/A                 |
|                          |     | (c) <i>Cohort study</i> —Summarise follow-up time (eg, average and total amount)                                                                                                                             |                     |
| Outcome data             | 15* | Cohort study—Report numbers of outcome events or summary measures over time                                                                                                                                  | 14-15               |
| Main results             | 16  | (a) Give unadjusted estimates and, if applicable, confounder-adjusted estimates and their precision (eg, 95% confidence interval). Make clear which confounders were adjusted for and why they were included | 14-17               |
|                          |     | (b) Report category boundaries when continuous variables were categorized                                                                                                                                    | N/A                 |
|                          |     | (c) If relevant, consider translating estimates of relative risk into absolute risk for a meaningful time period                                                                                             | N/A                 |
| Other analyses           | 17  | Report other analyses done—eg analyses of subgroups and interactions, and sensitivity analyses                                                                                                               | 17                  |
| <b>Discussion</b>        |     |                                                                                                                                                                                                              |                     |
| Key results              | 18  | Summarise key results with reference to study objectives                                                                                                                                                     | 17-23               |
| Limitations              | 19  | Discuss limitations of the study, taking into account sources of potential bias or imprecision. Discuss both direction and magnitude of any potential bias                                                   | 21-22               |
| Interpretation           | 20  | Give a cautious overall interpretation of results considering objectives, limitations, multiplicity of analyses, results from similar studies, and other relevant evidence                                   | 17-23               |
| Generalisability         | 21  | Discuss the generalisability (external validity) of the study results                                                                                                                                        | 17-23               |
| <b>Other information</b> |     |                                                                                                                                                                                                              |                     |
| Funding                  | 22  | Give the source of funding and the role of the funders for the present study and, if applicable, for the original study on which the present article is based                                                | 23-24               |

\*Give information separately for cases and controls in case-control studies and, if applicable, for exposed and unexposed groups in cohort and cross-sectional studies.

**Note:** An Explanation and Elaboration article discusses each checklist item and gives methodological background and published examples of transparent reporting. The STROBE checklist is best used in conjunction with this article (freely available on the Web sites of PLoS Medicine at <http://www.plosmedicine.org/>, Annals of Internal Medicine at <http://www.annals.org/>, and Epidemiology at <http://www.epidem.com/>). Information on the STROBE Initiative is available at [www.strobe-statement.org](http://www.strobe-statement.org).
