# Supplementary material for: Exposure to early-life adversity and long-term trajectories of multimorbidity among older adults in China: analysis of longitudinal data from the China Health and Retirement Longitudinal Study
Source: PubMed Central journal article supplement — BMJ Open. 2024 Mar 13;14(3):e075834. doi: 10.1136/bmjopen-2023-075834 (PMC10941172; doi:10.1136/bmjopen-2023-075834), 2024-03-13
Supplement: bmjopen-2023-075834supp001.pdf [file bmjopen-2023-075834supp001.pdf]

## **Supplemental Figures**

**eFigure 1** Retracing the Development of Chronic Disease in the Sample

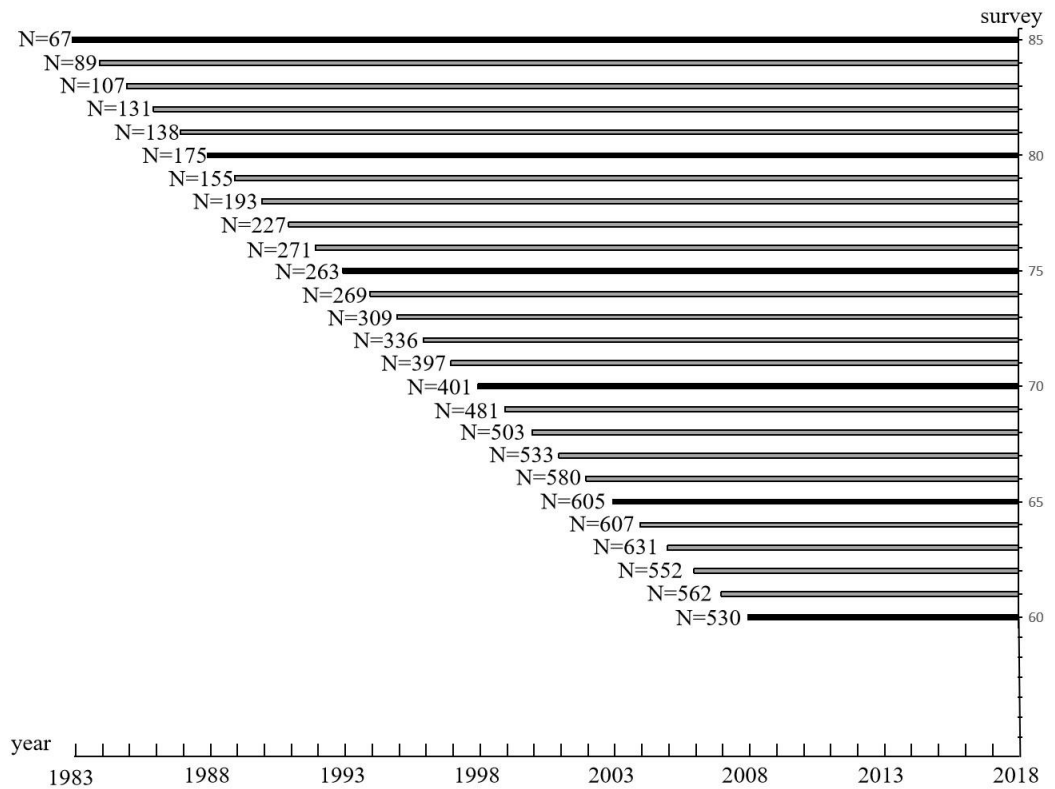

**eFigure 1 Retracing the Development of Chronic Disease in the Sample.**

N = number; The total number of respondents was 9,112.
